# Supplementary material for: Characterization of Plasmodium vivax Proteins in Plasma-Derived Exosomes From Malaria-Infected Liver-Chimeric Humanized Mice
Source: Front Microbiol. 2018 Jun 25;9:1271. doi: 10.3389/fmicb.2018.01271 (PMC6026661; doi:10.3389/fmicb.2018.01271)
Supplement: Data Sheet S3 — Statistical analysis of H. sapiens proteins identified in the ExEFs and MvEFs and in the ExEFs of infected and uninfected mice from Experimental infection 1. [file Data_Sheet_3.XLSX]

## Sheet: Table 1
Table 1. Statistical analysis of H. sapiens proteins identified in the ExEFs and MvEFs from Experimental infection 1. Protein abundance data was estimated from the average peak area of the 3 top peptides for a given protein. Censured and lineal statistical methods were applied for statistical comparison of ExEFs versus MvEFs. Proteins with statistically significant diference (P<0.05) are showed i…																		MvEF										ExEF
Accession	Statistic method applied	P.val.cens	adj.P.val	FC	Description	Coverage	calc. pI	Modifications	# Unique Peptides	Presencia >=2 MvEF	Presencia >=2 ExEF	# Protein Groups	# Peptides	# PSMs	Master	MW [kDa]	# AAs	Control M4	Control M3	Control M2	Control M1	Day 86 M6	Day 85 M5	Day 84 M4	Day 83 M3	Day 82 M2	Day 81 M1	Control M4	Control M3	Control M2	Control M1	Day 86 M6	Day 85 M5	Day 84 M4	Day 83 M3	Day 82 M2	Day 81 M1
O75882	Censurados	2.02662e-07	5.37055e-06	-6.64777	Attractin OS=Homo sapiens GN=ATRN PE=1 SV=2	7.83765	7.31		8	10	2	1	8	41	IsMasterProtein	158.432	1429	2700000	2500000	4600000	8200000	16000000	11000000	7000000	22000000	32000000	9600000							3500000	3100000
P43652	Censurados	3.93222e-06	4.72635e-05	-9.67363	Afamin OS=Homo sapiens GN=AFM PE=1 SV=1	39.5659	5.9		17	10	1	1	20	112	IsMasterProtein	69.024	599	900000	2000000	10000000	20000000	44000000	57000000	70000000	90000000	57000000	15000000							37000000
P0C0S8	Censurados	8.17665e-06	8.25452e-05	9.4641	Histone H2A type 1 OS=Homo sapiens GN=HIST1H2AG PE=1 SV=2	21.5385	10.9		2	2	9	1	2	12	IsMasterProtein	14.083	130	2300000									2200000	32000000	6600000	9600000		13000000	5400000	5700000	17000000	15000000	12000000
P35579	Censurados	1.3682e-05	0.000126113	7.71584	Myosin-9 OS=Homo sapiens GN=MYH9 PE=1 SV=4	23.4694	5.6		6	3	9	1	36	99	IsMasterProtein	226.392	1960				8900000	4100000			1700000			21000000	4600000	8500000		7200000	3600000	5700000	10000000	30000000	4300000
P01031	Censurados	2.52992e-05	0.000214537	-6.06296	Complement C5 OS=Homo sapiens GN=C5 PE=1 SV=4	42.0048	6.52		49	10	5	1	52	291	IsMasterProtein	188.186	1676	18000000	10000000	22000000	55000000	100000000	62000000	26000000	62000000	250000000	34000000						1100000	11000000	7300000	21000000	1600000
P49720	Censurados	3.14944e-05	0.000256801	-5.59411	Proteasome subunit beta type-3 OS=Homo sapiens GN=PSMB3 PE=1 SV=2	28.7805	6.55		4	10	4	1	4	23	IsMasterProtein	22.933	205	7200000	8500000	6700000	19000000	33000000	11000000	11000000	14000000	75000000	15000000					1200000		3600000	4600000	5800000
P27169	Censurados	4.81488e-05	0.000340252	-6.11071	Serum paraoxonase/arylesterase 1 OS=Homo sapiens GN=PON1 PE=1 SV=3	38.3099	5.22		8	10	5	1	9	59	IsMasterProtein	39.706	355	7500000	33000000	26000000	120000000	150000000	56000000	55000000	64000000	190000000	18000000	2200000					2000000	27000000	6500000	13000000
P25787	Censurados	6.2131e-05	0.000424896	-7.15928	Proteasome subunit alpha type-2 OS=Homo sapiens GN=PSMA2 PE=1 SV=2	32.4786	7.43		4	10	3	1	4	28	IsMasterProtein	25.882	234	15000000	12000000	17000000	67000000	63000000	15000000	19000000	11000000	83000000	13000000							11000000	9000000	14000000
P05155	Censurados	0.000100764	0.000628294	-7.29345	Plasma protease C1 inhibitor OS=Homo sapiens GN=SERPING1 PE=1 SV=2	36.6	6.55		13	10	5	1	15	137	IsMasterProtein	55.119	500	48000000	63000000	120000000	200000000	400000000	210000000	170000000	390000000	520000000	180000000			5000000			6100000	110000000	36000000	23000000
O14791	Censurados	0.000115022	0.000696707	-5.48074	Apolipoprotein L1 OS=Homo sapiens GN=APOL1 PE=1 SV=5	18.8442	5.81		5	10	4	1	5	30	IsMasterProtein	43.947	398	2500000	7700000	5900000	16000000	49000000	17000000	16000000	37000000	32000000	9400000	4100000		1300000				7600000	3500000
P02790	Censurados	0.000154193	0.000860237	-8.02963	Hemopexin OS=Homo sapiens GN=HPX PE=1 SV=2	49.3506	7.02		13	10	4	1	14	93	IsMasterProtein	51.643	462	40000000	39000000	100000000	61000000	140000000	74000000	320000000	840000000	160000000	65000000						7000000	260000000	32000000		2400000
P00747	Censurados	0.000159429	0.000866639	-6.69487	Plasminogen OS=Homo sapiens GN=PLG PE=1 SV=2	52.8395	7.24		25	10	4	1	27	152	IsMasterProtein	90.51	810	4600000	6600000	21000000	50000000	76000000	61000000	88000000	120000000	110000000	37000000						1200000	58000000	7400000	19000000
P13671	Censurados	0.000178231	0.000921586	-6.76468	Complement component C6 OS=Homo sapiens GN=C6 PE=1 SV=3	18.6296	6.76		12	9	2	1	12	53	IsMasterProtein	104.718	934		2900000	3800000	10000000	18000000	14000000	8700000	23000000	14000000	7200000							5200000			710000
P06276	Censurados	0.00018723	0.000945064	-7.70367	Cholinesterase OS=Homo sapiens GN=BCHE PE=1 SV=1	28.4053	7.42		9	9	2	1	10	46	IsMasterProtein	68.374	602		6600000	12000000	18000000	50000000	19000000	15000000	25000000	50000000	3900000							6600000		3400000
P00738	Censurados	0.000317881	0.00137532	-8.43087	Haptoglobin OS=Homo sapiens GN=HP PE=1 SV=1	61.0837	6.58		10	10	4	1	23	213	IsMasterProtein	45.177	406	110000000	140000000	190000000	900000000	370000000	170000000	34000000	1100000000	57000000	46000000	31000000	9800000	17000000					77000000
P01008	Censurados	0.000386494	0.00163874	-4.85484	Antithrombin-III OS=Homo sapiens GN=SERPINC1 PE=1 SV=1	45.2586	6.71		13	10	7	1	22	299	IsMasterProtein	52.569	464	26000000	47000000	83000000	140000000	200000000	170000000	110000000	340000000	210000000	150000000			6400000		2000000	2900000	54000000	35000000	12000000	7000000
P35030	Censurados	0.000440734	0.00176154	4.99828	Trypsin-3 OS=Homo sapiens GN=PRSS3 PE=1 SV=2	4.27632	7.49		1	8	10	1	1	18	IsMasterProtein	32.508	304	49000000	27000000	59000000	45000000		27000000	7400000	39000000		35000000	53000000	71000000	140000000	13000000	26000000	84000000	97000000	85000000	67000000	32000000
P02749	Censurados	0.000448695	0.00176154	-4.59092	Beta-2-glycoprotein 1 OS=Homo sapiens GN=APOH PE=1 SV=3	35.0725	7.97		9	10	7	1	9	60	IsMasterProtein	38.273	345	6600000	25000000	33000000	100000000	130000000	140000000	160000000	330000000	210000000	97000000	2300000				1200000	2800000	74000000	12000000	11000000	4800000
P02760	Censurados	0.000655339	0.0024374	-4.27531	Protein AMBP OS=Homo sapiens GN=AMBP PE=1 SV=1	32.9545	6.25		10	10	8	1	10	127	IsMasterProtein	38.974	352	58000000	95000000	200000000	400000000	540000000	350000000	310000000	680000000	530000000	210000000	5100000		8700000		4600000	19000000	100000000	16000000	36000000	10000000
Q5D862	Lineal	0.000744688	0.0886179	42.1601	Filaggrin-2 OS=Homo sapiens GN=FLG2 PE=1 SV=1	6.69176	8.31		8	3	5	1	8	20	IsMasterProtein	247.928	2391	2400000							950000		530000	15000000	1400000			5600000			16000000		8200000
P05160	Censurados	0.000923437	0.00315756	-4.91111	Coagulation factor XIII B chain OS=Homo sapiens GN=F13B PE=1 SV=3	39.1831	6.39		15	10	5	1	17	84	IsMasterProtein	75.461	661	7700000	3900000	7600000	28000000	100000000	56000000	12000000	51000000	99000000	9700000						2100000	12000000	6900000	11000000	3100000
P02765	Censurados	0.000998795	0.00336102	-5.83367	Alpha-2-HS-glycoprotein OS=Homo sapiens GN=AHSG PE=1 SV=1	42.2343	5.72		6	10	6	1	10	114	IsMasterProtein	39.3	367	27000000	34000000	130000000	160000000	180000000	140000000	530000000	580000000	320000000	76000000	3000000				2700000		300000000	40000000	24000000	8400000
P12532	Censurados	0.00106341	0.00352256	-9.92296	Creatine kinase U-type, mitochondrial OS=Homo sapiens GN=CKMT1A PE=1 SV=1	17.506	8.34		5	9	2	1	5	15	IsMasterProtein	47.007	417	31000000	38000000		110000000	110000000	55000000	30000000	46000000	150000000	63000000			27000000		15000000
P00736	Censurados	0.00111797	0.00359104	-4.48581	Complement C1r subcomponent OS=Homo sapiens GN=C1R PE=1 SV=2	26.5248	6.21		9	10	5	1	13	103	IsMasterProtein	80.067	705	15000000	10000000	16000000	78000000	19000000	3400000	3000000	13000000	14000000	6600000	1300000		4100000				2000000	7800000	3200000
P19823	Censurados	0.00182312	0.00551559	-4.08694	Inter-alpha-trypsin inhibitor heavy chain H2 OS=Homo sapiens GN=ITIH2 PE=1 SV=2	51.5856	6.86		25	10	8	1	37	377	IsMasterProtein	106.397	946	75000000	120000000	190000000	480000000	770000000	350000000	340000000	780000000	660000000	160000000	8900000		13000000		4500000	11000000	97000000	60000000	83000000	14000000
P09871	Censurados	0.0018472	0.00551559	-4.19739	Complement C1s subcomponent OS=Homo sapiens GN=C1S PE=1 SV=1	28.343	4.96		11	10	5	1	12	80	IsMasterProtein	76.635	688	4400000	2400000	4600000	39000000	18000000	6700000	7800000	18000000	39000000	15000000	1100000						8100000	6200000	4400000	2800000
Q86YZ3	Censurados	0.00188304	0.0055445	6.26828	Hornerin OS=Homo sapiens GN=HRNR PE=1 SV=2	17.8596	10.04		15	5	9	1	15	105	IsMasterProtein	282.228	2850	15000000	2300000				560000		4900000	6600000		50000000	20000000	5200000		15000000	1000000	9500000	88000000	8800000	73000000
P02774	Censurados	0.00216691	0.00620791	-4.20156	Vitamin D-binding protein OS=Homo sapiens GN=GC PE=1 SV=1	70.8861	5.54		17	10	7	1	23	162	IsMasterProtein	52.929	474	7100000	10000000	34000000	35000000	60000000	87000000	230000000	220000000	79000000	25000000			450000		780000	2700000	140000000	10000000	3600000	5000000
P08603	Censurados	0.00375052	0.00957964	-4.9709	Complement factor H OS=Homo sapiens GN=CFH PE=1 SV=4	46.1413	6.61		42	10	7	1	44	528	IsMasterProtein	139.005	1231	90000000	70000000	160000000	430000000	940000000	600000000	360000000	690000000	1200000000	360000000			8000000		8800000	27000000	110000000	170000000	97000000	31000000
P05109	Lineal	0.0044087	0.130632	500.755	Protein S100-A8 OS=Homo sapiens GN=S100A8 PE=1 SV=1	52.6882	7.03		7	2	3	1	7	20	IsMasterProtein	10.828	93		4900000					2800000				250000000				780000000					2000000
Q00610	Lineal	0.00466216	0.130632	465.473	Clathrin heavy chain 1 OS=Homo sapiens GN=CLTC PE=1 SV=5	15.2239	5.69		17	2	7	1	17	32	IsMasterProtein	191.493	1675				5800000	3300000						3600000	18000000	1100000		62000000		1400000	1800000		9100000
P19652	Censurados	0.00497089	0.0125456	-4.9728	Alpha-1-acid glycoprotein 2 OS=Homo sapiens GN=ORM2 PE=1 SV=2	40.2985	5.11		6	10	6	1	8	97	IsMasterProtein	23.588	201	11000000	11000000	21000000	51000000	190000000	73000000	240000000	480000000	320000000	100000000	590000					8000000	110000000	44000000	16000000	12000000
P06702	Lineal	0.00548875	0.130632	377.15	Protein S100-A9 OS=Homo sapiens GN=S100A9 PE=1 SV=1	60.5263	6.13		6	1	3	1	6	28	IsMasterProtein	13.234	114		4000000									190000000				430000000					1800000
P22792	Censurados	0.00601363	0.0148243	-4.09989	Carboxypeptidase N subunit 2 OS=Homo sapiens GN=CPN2 PE=1 SV=3	51.9266	5.99		15	10	7	1	15	141	IsMasterProtein	60.518	545	30000000	39000000	63000000	190000000	270000000	140000000	98000000	230000000	190000000	100000000			8400000		3500000	12000000	36000000	41000000	28000000	15000000
O43451	Censurados	0.00622224	0.0149762	-5.9225	Maltase-glucoamylase, intestinal OS=Homo sapiens GN=MGAM PE=1 SV=5	2.53096	5.5		3	8	3	1	3	16	IsMasterProtein	209.72	1857	8900000	12000000	13000000	36000000	3300000	8500000			12000000	11000000	2400000							2100000		1600000
P01009	Censurados	0.00718081	0.0167289	-5.21723	Alpha-1-antitrypsin OS=Homo sapiens GN=SERPINA1 PE=1 SV=3	66.0287	5.59		30	10	7	1	30	320	IsMasterProtein	46.707	418	59000000	84000000	230000000	320000000	1700000000	1200000000	1000000000	1700000000	3200000000	190000000			3300000		17000000	58000000	890000000	99000000	400000000	25000000
P00450	Censurados	0.00747355	0.0170731	-3.31045	Ceruloplasmin OS=Homo sapiens GN=CP PE=1 SV=1	51.6432	5.72		29	10	8	1	37	398	IsMasterProtein	122.128	1065	44000000	23000000	110000000	100000000	190000000	190000000	210000000	430000000	150000000	89000000	5600000		6300000		2800000	11000000	98000000	15000000	31000000	13000000
P02763	Censurados	0.00820606	0.0183125	-6.58119	Alpha-1-acid glycoprotein 1 OS=Homo sapiens GN=ORM1 PE=1 SV=1	40.796	5.02		5	9	4	1	7	72	IsMasterProtein	23.497	201	6000000		29000000	32000000	34000000	60000000	320000000	370000000	110000000	45000000						6200000	220000000	5100000		2800000
Q96PD5	Censurados	0.00855409	0.0188903	-8.09703	N-acetylmuramoyl-L-alanine amidase OS=Homo sapiens GN=PGLYRP2 PE=1 SV=1	34.0278	7.55		11	8	2	1	11	51	IsMasterProtein	62.178	576			5900000	19000000	40000000	28000000	36000000	150000000	44000000	8500000							28000000	8800000
P04275	Censurados	0.00981079	0.0212233	5.58669	von Willebrand factor OS=Homo sapiens GN=VWF PE=1 SV=4	4.08816	5.48		3	6	9	1	10	81	IsMasterProtein	309.058	2813	8400000			29000000	50000000	36000000			120000000	52000000	38000000	75000000	68000000		31000000	44000000	25000000	47000000	310000000	40000000
P0C0L4	Censurados	0.0128968	0.0270706	-4.01812	Complement C4-A OS=Homo sapiens GN=C4A PE=1 SV=2	55.2752	7.08		2	10	6	1	68	637	IsMasterProtein	192.664	1744	11000000	8000000	13000000	50000000	170000000	120000000	53000000	90000000	72000000	22000000					4900000	8600000	17000000	26000000	19000000	5100000
P10599	Lineal	0.0133353	0.229906	128.687	Thioredoxin OS=Homo sapiens GN=TXN PE=1 SV=3	20.9524	4.92		2	1	5	1	2	6	IsMasterProtein	11.73	105					5600000						23000000		4300000		39000000			17000000	6400000
Q14624	Censurados	0.0154052	0.0311038	-5.05484	Inter-alpha-trypsin inhibitor heavy chain H4 OS=Homo sapiens GN=ITIH4 PE=1 SV=4	40.5376	6.98		23	10	5	1	26	140	IsMasterProtein	103.293	930	4700000	4500000	9300000	18000000	200000000	160000000	93000000	250000000	260000000	40000000					4800000	14000000	58000000	48000000	43000000
P31151	Lineal	0.0161613	0.229906	103.352	Protein S100-A7 OS=Homo sapiens GN=S100A7 PE=1 SV=4	54.4554	6.77		6	3	2	1	6	22	IsMasterProtein	11.464	101	6200000	13000000					3600000				49000000				340000000
P03952	Censurados	0.016437	0.0325227	-4.97384	Plasma kallikrein OS=Homo sapiens GN=KLKB1 PE=1 SV=1	56.8966	8.22		24	10	5	1	25	179	IsMasterProtein	71.323	638	2400000	4900000	8300000	10000000	280000000	110000000	87000000	200000000	420000000	29000000					3000000	10000000	44000000	62000000	56000000
P19827	Censurados	0.017758	0.0339162	-4.30502	Inter-alpha-trypsin inhibitor heavy chain H1 OS=Homo sapiens GN=ITIH1 PE=1 SV=3	38.7486	6.79		25	10	7	1	26	293	IsMasterProtein	101.326	911	59000000	95000000	140000000	320000000	720000000	330000000	210000000	540000000	970000000	190000000	5700000		19000000			800000000	130000000	75000000	120000000	14000000
P02652	Lineal	0.0232007	0.275641	-3.97152	Apolipoprotein A-II OS=Homo sapiens GN=APOA2 PE=1 SV=1	62	6.62		6	10	10	1	6	121	IsMasterProtein	11.168	100	290000000	370000000	740000000	1300000000	3800000000	1500000000	1600000000	3200000000	3100000000	960000000	48000000	22000000	120000000	3200000	85000000	190000000	1900000000	1100000000	490000000	150000000
P08697	Censurados	0.0245354	0.0444574	-3.89001	Alpha-2-antiplasmin OS=Homo sapiens GN=SERPINF2 PE=1 SV=3	24.4399	6.29		8	10	6	1	9	65	IsMasterProtein	54.531	491	9700000	11000000	21000000	20000000	130000000	76000000	51000000	110000000	240000000	44000000			4200000		8700000	13000000	34000000	24000000	63000000
P01042	Censurados	0.0248833	0.0447056	-3.37669	Kininogen-1 OS=Homo sapiens GN=KNG1 PE=1 SV=2	40.528	6.81		20	10	8	1	21	204	IsMasterProtein	71.912	644	35000000	31000000	86000000	130000000	640000000	430000000	460000000	1100000000	1100000000	300000000	6300000		2900000		10000000	26000000	310000000	180000000	100000000	41000000
P80108	Lineal	0.0254794	0.275641	-14.4678	Phosphatidylinositol-glycan-specific phospholipase D OS=Homo sapiens GN=GPLD1 PE=1 SV=3	17.1429	6.37		8	6	2	1	9	37	IsMasterProtein	92.278	840					14000000	7700000	13000000	8600000	43000000	6200000							4300000		1800000
P02647	Censurados	0.0307737	0.0539176	-2.82443	Apolipoprotein A-I OS=Homo sapiens GN=APOA1 PE=1 SV=1	61.4232	5.76		19	10	9	1	19	283	IsMasterProtein	30.759	267	240000000	900000000	790000000	1800000000	3800000000	1300000000	1700000000	5500000000	1300000000	760000000	48000000	23000000	81000000		67000000	210000000	1400000000	1400000000	230000000	150000000
P02787	Censurados	0.0321881	0.0554788	-2.78474	Serotransferrin OS=Homo sapiens GN=TF PE=1 SV=3	65.9026	7.12		36	10	9	1	39	671	IsMasterProtein	77.014	698	280000000	340000000	860000000	1500000000	1100000000	1200000000	2700000000	3500000000	1900000000	480000000	100000000	39000000	86000000		18000000	31000000	1700000000	260000000	150000000	97000000
P48740	Censurados	0.0377844	0.0640824	-5.3768	Mannan-binding lectin serine protease 1 OS=Homo sapiens GN=MASP1 PE=1 SV=3	25.1788	5.49		8	8	3	1	14	101	IsMasterProtein	79.195	699	670000			19000000	21000000	7600000	7500000	15000000	38000000	25000000							5200000	5900000		12000000
O15270	Censurados	0.0409879	0.0678862	-5.87979	Serine palmitoyltransferase 2 OS=Homo sapiens GN=SPTLC2 PE=1 SV=1	1.24555	7.78		1	10	7	1	1	17	IsMasterProtein	62.884	562	13000000000	13000000000	13000000000	35000000000	19000000000	7300000000	3400000000	8800000000	34000000000	10000000000	1100000000		5200000000		1500000000	2100000000	2900000000	7300000000	14000000000
P01023	Lineal	0.0437281	0.387412	-4.45834	Alpha-2-macroglobulin OS=Homo sapiens GN=A2M PE=1 SV=3	77.2049	6.46		94	10	10	1	108	5410	IsMasterProtein	163.188	1474	13000000000	18000000000	20000000000	45000000000	22000000000	5900000000	3600000000	9700000000	8800000000	2600000000	3300000000	1200000000	6000000000	1300000	390000000	790000000	3000000000	5000000000	1600000000	550000000
P02655	Lineal	0.044682	0.387412	3.14994	Apolipoprotein C-II OS=Homo sapiens GN=APOC2 PE=1 SV=1	59.4059	4.72		13	10	10	1	13	160	IsMasterProtein	11.277	101	820000000	1100000000	770000000	5100000000	950000000	480000000	340000000	1000000000	1300000000	420000000	4000000000	1900000000	4200000000	470000000	260000000	420000000	1100000000	3500000000	1600000000	570000000
P0C0L5	Censurados	0.0566969	0.0902974	-2.78066	Complement C4-B OS=Homo sapiens GN=C4B PE=1 SV=2	56.0206	7.27		4	10	7	1	69	661	IsMasterProtein	192.631	1744	17000000	6600000	17000000	53000000	180000000	89000000	24000000	60000000	90000000	14000000			3700000		9900000	17000000	12000000	20000000	28000000	3800000
P00742	Lineal	0.0624606	0.409372	-7.57451	Coagulation factor X OS=Homo sapiens GN=F10 PE=1 SV=2	10.041	5.94		3	3	3	1	4	17	IsMasterProtein	54.697	488						5300000	4800000	13000000								270000		3600000	590000
P00748	Censurados	0.0639779	0.0968808	-5.03454	Coagulation factor XII OS=Homo sapiens GN=F12 PE=1 SV=3	23.0894	7.74		10	8	4	1	10	52	IsMasterProtein	67.748	615			5400000	5400000	110000000	77000000	53000000	130000000	170000000	7900000						4700000	16000000	17000000	9400000
P01024	Censurados	0.0676193	0.101669	-2.29265	Complement C3 OS=Homo sapiens GN=C3 PE=1 SV=2	75.8268	6.4		93	10	9	1	102	1406	IsMasterProtein	187.03	1663	79000000	77000000	170000000	360000000	1700000000	1200000000	390000000	800000000	2800000000	380000000	12000000	2200000	17000000		59000000	180000000	250000000	210000000	800000000	68000000
O00187	Lineal	0.0770096	0.454875	-5.17403	Mannan-binding lectin serine protease 2 OS=Homo sapiens GN=MASP2 PE=1 SV=4	7.58017	5.63		2	6	3	1	4	31	IsMasterProtein	75.654	686					5200000	10000000	3000000	5700000	22000000	14000000						1500000	2000000		2900000
P01019	Censurados	0.0940654	0.13753	-3.78654	Angiotensinogen OS=Homo sapiens GN=AGT PE=1 SV=1	32.3711	6.32		9	8	5	1	9	58	IsMasterProtein	53.121	485			4100000	3900000	89000000	35000000	45000000	67000000	120000000	16000000					780000	2000000	20000000	4900000	11000000
P04196	Censurados	0.101163	0.146895	-2.74161	Histidine-rich glycoprotein OS=Homo sapiens GN=HRG PE=1 SV=1	35.8095	7.5		16	10	8	1	16	262	IsMasterProtein	59.541	525	26000000	29000000	63000000	140000000	1100000000	460000000	390000000	1500000000	780000000	320000000	3600000		9300000		27000000	60000000	320000000	530000000	150000000	84000000
Q8TEA1	Lineal	0.140372	0.605736	-10.7371	Putative methyltransferase NSUN6 OS=Homo sapiens GN=NSUN6 PE=1 SV=1	1.49254	7.96		1	3	1	1	1	4	IsMasterProtein	51.737	469						45000000	9800000		35000000								1600000
Q9NZT1	Censurados	0.151479	0.212673	5.27491	Calmodulin-like protein 5 OS=Homo sapiens GN=CALML5 PE=1 SV=2	71.2329	4.44	Acetyl [N-Term]	10	4	6	1	10	34	IsMasterProtein	15.883	146	9700000				19000000			4700000	21000000		100000000	5900000			92000000		6400000	39000000		32000000
P02654	Lineal	0.154405	0.605736	-9.74651	Apolipoprotein C-I OS=Homo sapiens GN=APOC1 PE=1 SV=1	43.3735	8.47		3	2	6	1	4	36	IsMasterProtein	9.326	83								1400000000	340000000		180000000	68000000	220000000	95000000				580000000		140000000
P02671	Lineal	0.16883	0.605736	-2.30064	Fibrinogen alpha chain OS=Homo sapiens GN=FGA PE=1 SV=2	44.3418	6.01		35	10	10	1	38	1154	IsMasterProtein	94.914	866	5000000000	6500000000	7700000000	18000000000	15000000000	5300000000	2100000000	4400000000	10000000000	5900000000	1400000000	680000000	2900000000	24000000	830000000	1000000000	1800000000	3900000000	5800000000	1800000000
Q01469	Lineal	0.173067	0.605736	8.67547	Fatty acid-binding protein, epidermal OS=Homo sapiens GN=FABP5 PE=1 SV=3	59.2593	7.01	Acetyl [N-Term]	7	1	4	1	7	14	IsMasterProtein	15.155	135		9300000									11000000				29000000			2600000		1400000
P02766	Censurados	0.174446	0.240146	-2.86621	Transthyretin OS=Homo sapiens GN=TTR PE=1 SV=1	48.9796	5.76		7	9	6	1	7	52	IsMasterProtein	15.877	147		1600000	14000000	6300000	55000000	84000000	96000000	160000000	130000000	31000000					1800000	8300000	89000000	18000000	28000000	4400000
P04003	Censurados	0.181772	0.247024	-1.75364	C4b-binding protein alpha chain OS=Homo sapiens GN=C4BPA PE=1 SV=2	66.6667	7.3		29	10	9	1	29	578	IsMasterProtein	66.989	597	630000000	450000000	670000000	2000000000	3600000000	1800000000	770000000	1300000000	2900000000	1500000000	240000000	75000000	360000000		250000000	350000000	540000000	1200000000	1300000000	470000000
P04114	Censurados	0.194911	0.263191	-1.85608	Apolipoprotein B-100 OS=Homo sapiens GN=APOB PE=1 SV=2	74.096	7.05		280	10	9	1	298	6181	IsMasterProtein	515.283	4563	570000000	630000000	840000000	4000000000	9200000000	3400000000	1100000000	2700000000	6400000000	2600000000	370000000	120000000	530000000		400000000	1000000000	1300000000	1500000000	2000000000	890000000
Q86XR2	Censurados	0.203575	0.271434	-3.95563	Niban-like protein 2 OS=Homo sapiens GN=FAM129C PE=1 SV=2	1.14778	8.63		1	7	4	1	1	11	IsMasterProtein	77.364	697	30000000	21000000	27000000		31000000	15000000	8200000	19000000								22000000	5000000	11000000		9000000
P20851	Censurados	0.210558	0.278989	-1.39296	C4b-binding protein beta chain OS=Homo sapiens GN=C4BPB PE=1 SV=1	53.5714	5.14		11	10	9	1	11	138	IsMasterProtein	28.338	252	61000000	130000000	82000000	230000000	250000000	80000000	48000000	76000000	380000000	66000000	6600000	1700000	30000000		7900000	26000000	47000000	55000000	160000000	120000000
P62979	Censurados	0.224177	0.295189	2.78138	Ubiquitin-40S ribosomal protein S27a OS=Homo sapiens GN=RPS27A PE=1 SV=2	25.641	9.64		4	7	7	1	4	22	IsMasterProtein	17.953	156	4200000	8600000		16000000	9700000	2100000		3600000	17000000		16000000	12000000	15000000		16000000			31000000	39000000	37000000
P81605	Censurados	0.229276	0.298199	1.42306	Dermcidin OS=Homo sapiens GN=DCD PE=1 SV=2	22.7273	6.54		3	10	9	1	3	33	IsMasterProtein	11.277	110	43000000	72000000	41000000	85000000	63000000	33000000	14000000	81000000	110000000	37000000	93000000	53000000	53000000		64000000	38000000	96000000	260000000	290000000	130000000
P02743	Lineal	0.257279	0.729999	-5.74725	Serum amyloid P-component OS=Homo sapiens GN=APCS PE=1 SV=2	5.8296	6.54		1	8	1	1	1	9	IsMasterProtein	25.371	223			2500000	2500000	27000000	18000000	11000000	29000000	28000000	3600000							4700000
P35542	Censurados	0.260965	0.32957	-1.59611	Serum amyloid A-4 protein OS=Homo sapiens GN=SAA4 PE=1 SV=2	33.0769	9.07		4	10	8	1	4	50	IsMasterProtein	14.737	130	14000000	25000000	39000000	130000000	290000000	190000000	49000000	120000000	250000000	60000000	14000000	7500000	60000000		16000000	34000000	77000000	65000000	95000000
P02679	Censurados	0.261524	0.32957	-1.76788	Fibrinogen gamma chain OS=Homo sapiens GN=FGG PE=1 SV=3	79.9117	5.62		23	10	9	1	32	1188	IsMasterProtein	51.479	453	5800000000	6400000000	8000000000	20000000000	16000000000	4700000000	2900000000	5900000000	16000000000	4100000000	1400000000	530000000	3000000000		700000000	1200000000	1600000000	4600000000	6900000000	2100000000
Q8TF72	Lineal	0.263781	0.729999	-5.59713	Protein Shroom3 OS=Homo sapiens GN=SHROOM3 PE=1 SV=2	0.450902	7.8		1	2	4	1	1	6	IsMasterProtein	216.724	1996				190000000		240000000								32000000	420000000			640000000	11000000
O95445	Censurados	0.264596	0.329967	-1.02174	Apolipoprotein M OS=Homo sapiens GN=APOM PE=1 SV=2	46.2766	6.01		6	10	9	1	6	59	IsMasterProtein	21.239	188	22000000	29000000	53000000	110000000	140000000	89000000	16000000	78000000	92000000	14000000	7600000	7500000	31000000		3600000	12000000	27000000	31000000	19000000	7700000
P10909	Censurados	0.277313	0.343803	-1.28326	Clusterin OS=Homo sapiens GN=CLU PE=1 SV=1	33.1849	6.27		15	10	9	1	15	179	IsMasterProtein	52.461	449	52000000	52000000	67000000	290000000	1000000000	470000000	380000000	920000000	1400000000	370000000	40000000	9300000	30000000		49000000	85000000	150000000	210000000	450000000	110000000
P02675	Censurados	0.279409	0.344388	-1.68197	Fibrinogen beta chain OS=Homo sapiens GN=FGB PE=1 SV=2	71.8941	8.27		25	10	9	1	37	1806	IsMasterProtein	55.892	491	5100000000	6400000000	7100000000	17000000000	13000000000	4600000000	2500000000	5200000000	14000000000	5500000000	1500000000	620000000	2600000000		750000000	880000000	1500000000	3600000000	4300000000	2000000000
P00739	Censurados	0.282809	0.344572	-2.80736	Haptoglobin-related protein OS=Homo sapiens GN=HPR PE=2 SV=2	50.5747	7.09		6	7	5	1	18	152	IsMasterProtein	39.005	348			4500000		44000000	32000000	11000000	56000000	77000000	42000000						1900000	5000000	7400000	7900000	15000000
P49908	Lineal	0.298966	0.757037	-4.89461	Selenoprotein P OS=Homo sapiens GN=SEPP1 PE=1 SV=3	13.9108	7.87		3	2	2	1	4	9	IsMasterProtein	43.156	381							17000000			18000000									13000000	4100000
P12259	Censurados	0.299708	0.363075	-1.07435	Coagulation factor V OS=Homo sapiens GN=F5 PE=1 SV=4	26.3489	6.05		36	10	9	1	49	371	IsMasterProtein	251.546	2224	2400000	24000000	14000000	66000000	340000000	58000000	32000000	210000000	140000000	100000000	5100000	2200000	6300000		10000000	5200000	24000000	110000000	33000000	33000000
P00167	Lineal	0.305359	0.757037	-2.79068	Cytochrome b5 OS=Homo sapiens GN=CYB5A PE=1 SV=2	15.6716	4.96		1	3	3	1	1	8	IsMasterProtein	15.321	134					13000000	2300000			12000000						1700000	730000				8700000
O43823	Lineal	0.324001	0.771121	4.48459	A-kinase anchor protein 8 OS=Homo sapiens GN=AKAP8 PE=1 SV=1	1.30058	5.15		1	5	1	1	1	6	IsMasterProtein	76.061	692					14000000	4000000		3600000	9400000	5100000						4900000
Q96CF2	Censurados	0.370295	0.4198	-4.66026	Charged multivesicular body protein 4c OS=Homo sapiens GN=CHMP4C PE=1 SV=1	3.43348	6.07		1	6	4	1	1	11	IsMasterProtein	26.394	233				980000000	2700000000	390000000		180000000	1600000000	170000000	220000000	19000000					310000000		1300000000
P61769	Censurados	0.388217	0.433168	-1.82611	Beta-2-microglobulin OS=Homo sapiens GN=B2M PE=1 SV=1	31.9328	6.52		3	8	6	1	3	24	IsMasterProtein	13.706	119		9400000	4400000	16000000	41000000	24000000	21000000	70000000	47000000		3100000		5300000		2000000		30000000	13000000	16000000
P07225	Censurados	0.39729	0.436402	-0.964359	Vitamin K-dependent protein S OS=Homo sapiens GN=PROS1 PE=1 SV=1	39.9408	5.67		19	10	9	1	20	169	IsMasterProtein	75.074	676	31000000	43000000	56000000	110000000	840000000	120000000	67000000	170000000	420000000	200000000	33000000	2100000	39000000		38000000	25000000	45000000	160000000	140000000	54000000
Q13790	Censurados	0.410173	0.44823	2.39289	Apolipoprotein F OS=Homo sapiens GN=APOF PE=1 SV=2	22.0859	5.64		4	5	6	1	4	19	IsMasterProtein	35.377	326					32000000	5000000		13000000	20000000	9300000					11000000	15000000	2800000	12000000	7500000	15000000
P36980	Lineal	0.434059	0.870272	-3.22406	Complement factor H-related protein 2 OS=Homo sapiens GN=CFHR2 PE=1 SV=1	12.5926	6.38		2	4	1	1	3	14	IsMasterProtein	30.631	270						2300000	5300000	14000000	14000000								1500000
O60814	Lineal	0.436279	0.870272	3.2049	Histone H2B type 1-K OS=Homo sapiens GN=HIST1H2BK PE=1 SV=3	31.746	10.32		4	1	3	1	4	7	IsMasterProtein	13.882	126										8400000	14000000	820000			2800000
P08519	Lineal	0.450683	0.870272	2.70355	Apolipoprotein(a) OS=Homo sapiens GN=LPA PE=1 SV=1	29.5075	5.88		6	3	5	1	6	16	IsMasterProtein	500.995	4548					4900000				76000000	32000000					33000000	20000000		5400000	140000000	4200000
P02656	Lineal	0.456091	0.870272	-1.58166	Apolipoprotein C-III OS=Homo sapiens GN=APOC3 PE=1 SV=1	62.6263	5.41		8	10	10	1	8	75	IsMasterProtein	10.845	99	430000000	540000000	530000000	2100000000	1200000000	700000000	550000000	1400000000	1400000000	460000000	820000000	380000000	830000000	58000000	120000000	150000000	570000000	790000000	810000000	290000000
P20742	Lineal	0.465495	0.870272	-2.96897	Pregnancy zone protein OS=Homo sapiens GN=PZP PE=1 SV=4	9.64912	6.38		1	4	2	1	13	861	IsMasterProtein	163.76	1482				96000000			10000000	39000000	1200000				12000000					10000000
P01011	Lineal	0.470561	0.870272	-2.93089	Alpha-1-antichymotrypsin OS=Homo sapiens GN=SERPINA3 PE=1 SV=2	43.9716	5.52		14	8	1	1	14	83	IsMasterProtein	47.621	423			5400000	10000000	68000000	51000000	85000000	200000000	180000000	26000000							77000000
P05156	Lineal	0.475358	0.870272	-2.89554	Complement factor I OS=Homo sapiens GN=CFI PE=1 SV=2	19.8971	7.5		8	7	1	1	9	32	IsMasterProtein	65.707	583			2900000		10000000	16000000	18000000	25000000	8700000	4000000							12000000
P02751	Censurados	0.488436	0.525627	-0.761962	Fibronectin OS=Homo sapiens GN=FN1 PE=1 SV=4	43.2523	5.71		35	10	9	1	65	458	IsMasterProtein	262.46	2386	41000000	43000000	66000000	330000000	33000000	5500000	5000000	44000000	17000000	43000000	11000000	3100000	37000000		3700000	5900000	5000000	43000000	21000000	25000000
P08185	Lineal	0.501371	0.8774	-2.71503	Corticosteroid-binding globulin OS=Homo sapiens GN=SERPINA6 PE=1 SV=1	33.8272	6.04		9	7	1	1	9	28	IsMasterProtein	45.112	405			2000000		13000000	14000000	40000000	24000000	37000000	4600000							22000000
P04004	Censurados	0.525639	0.554406	-1.66262	Vitronectin OS=Homo sapiens GN=VTN PE=1 SV=1	37.2385	5.8		11	8	7	1	14	121	IsMasterProtein	54.271	478			33000000	85000000	450000000	240000000	120000000	540000000	550000000	270000000			6800000		8000000	16000000	88000000	170000000	110000000	58000000
Q06033	Lineal	0.538044	0.881144	-2.48867	Inter-alpha-trypsin inhibitor heavy chain H3 OS=Homo sapiens GN=ITIH3 PE=1 SV=2	31.573	5.74		9	7	1	1	19	120	IsMasterProtein	99.787	890	9700000				76000000	48000000	43000000	87000000	95000000	2900000							29000000
P04217	Lineal	0.555343	0.881144	-2.39171	Alpha-1B-glycoprotein OS=Homo sapiens GN=A1BG PE=1 SV=4	27.6768	5.86		9	8	1	1	10	30	IsMasterProtein	54.22	495			3300000	5000000	8700000	3600000	35000000	48000000	13000000	2400000							21000000
P00734	Lineal	0.555343	0.881144	-2.39171	Prothrombin OS=Homo sapiens GN=F2 PE=1 SV=2	39.7106	5.9		11	8	1	1	16	86	IsMasterProtein	69.992	622			7700000	19000000	13000000	10000000	35000000	58000000	15000000	12000000							21000000
P55056	Lineal	0.569209	0.884915	-1.99861	Apolipoprotein C-IV OS=Homo sapiens GN=APOC4 PE=1 SV=1	19.685	8.92		2	3	6	1	2	11	IsMasterProtein	14.543	127				18000000	3100000					21000000			7300000		3200000	12000000		8000000	7200000	2300000
P06733	Lineal	0.593104	0.889978	-2.1986	Alpha-enolase OS=Homo sapiens GN=ENO1 PE=1 SV=2	22.3502	7.39		4	1	2	1	7	10	IsMasterProtein	47.139	434										13000000	5600000				7900000
P02753	Lineal	0.600158	0.889978	-2.16506	Retinol-binding protein 4 OS=Homo sapiens GN=RBP4 PE=1 SV=3	61.194	6.07		8	7	1	1	8	26	IsMasterProtein	22.995	201			3900000		21000000	42000000	70000000	67000000	9800000	20000000							81000000
P00367	Lineal	0.637807	0.889978	-1.99786	Glutamate dehydrogenase 1, mitochondrial OS=Homo sapiens GN=GLUD1 PE=1 SV=2	10.3943	7.8		5	5	1	1	5	13	IsMasterProtein	61.359	558					18000000		2400000	5000000	21000000	1000000							1300000
Q6NUS8	Lineal	0.707411	0.889978	1.73285	UDP-glucuronosyltransferase 3A1 OS=Homo sapiens GN=UGT3A1 PE=2 SV=1	1.91205	8.16		1	1	2	1	1	3	IsMasterProtein	59.113	523			120000000									370000000								33000000
Q9UGM5	Lineal	0.708939	0.889978	-1.72758	Fetuin-B OS=Homo sapiens GN=FETUB PE=1 SV=2	7.06806	6.83		3	3	1	1	3	5	IsMasterProtein	42.028	382						990000	2100000	3700000									1300000
P07357	Lineal	0.718791	0.889978	-1.69409	Complement component C8 alpha chain OS=Homo sapiens GN=C8A PE=1 SV=2	9.58904	6.47		4	6	1	1	4	15	IsMasterProtein	65.121	584					1800000	3500000	5100000	13000000	5800000	2700000							2500000
P05546	Lineal	0.719999	0.889978	-1.69005	Heparin cofactor 2 OS=Homo sapiens GN=SERPIND1 PE=1 SV=3	20.4409	6.9		5	4	1	1	9	40	IsMasterProtein	57.034	499					5500000		9800000	15000000	4100000								7300000
Q6Q788	Lineal	0.725074	0.889978	1.40431	Apolipoprotein A-V OS=Homo sapiens GN=APOA5 PE=1 SV=1	5.46448	6.43		1	3	3	1	1	6	IsMasterProtein	41.187	366				4000000					1800000	1100000			750000						1000000	1600000
P29622	Lineal	0.746572	0.889978	-1.60411	Kallistatin OS=Homo sapiens GN=SERPINA4 PE=1 SV=3	20.3747	7.75		6	6	1	1	6	16	IsMasterProtein	48.511	427					10000000	9900000	9400000	20000000	14000000	6700000							6900000
P05543	Lineal	0.748974	0.889978	-1.59662	Thyroxine-binding globulin OS=Homo sapiens GN=SERPINA7 PE=1 SV=2	9.15663	6.3		4	2	1	1	4	7	IsMasterProtein	46.295	415							5300000	6200000									2900000
P04278	Lineal	0.760968	0.889978	-1.55989	Sex hormone-binding globulin OS=Homo sapiens GN=SHBG PE=1 SV=2	17.1642	6.71		4	4	1	1	4	12	IsMasterProtein	43.752	402			1900000		3900000		6200000	12000000									3800000
P04406	Lineal	0.788726	0.893889	1.47887	Glyceraldehyde-3-phosphate dehydrogenase OS=Homo sapiens GN=GAPDH PE=1 SV=3	45.6716	8.46		6	1	3	1	10	24	IsMasterProtein	36.03	335										1800000	5800000				47000000					1800000
P00751	Lineal	0.82338	0.924361	-1.38484	Complement factor B OS=Homo sapiens GN=CFB PE=1 SV=2	27.4869	7.06		12	8	1	1	15	93	IsMasterProtein	85.479	764			6000000	9300000	37000000	88000000	51000000	72000000	76000000	31000000							45000000
P69905	Censurados	0.823479	0.839315	1.03583	Hemoglobin subunit alpha OS=Homo sapiens GN=HBA1 PE=1 SV=2	40.1408	8.68		2	6	6	1	4	34	IsMasterProtein	15.248	142		440000000			660000000	360000000		1400000000	460000000	380000000	1600000000	520000000			140000000			100000000	950000000	880000000
Q9NUQ6	Lineal	0.871614	0.929124	-1.26553	SPATS2-like protein OS=Homo sapiens GN=SPATS2L PE=1 SV=2	1.79211	9.64		1	1	1	1	1	2	IsMasterProtein	61.691	558				42000000																8100000
P11047	Lineal	0.871699	0.929124	1.17486	Laminin subunit gamma-1 OS=Homo sapiens GN=LAMC1 PE=1 SV=3	7.5202	5.12		1	5	3	1	10	34	IsMasterProtein	177.489	1609				12000000	12000000	8100000			15000000	6100000						3400000		7800000		6100000
P25311	Lineal	0.889215	0.93643	1.22497	Zinc-alpha-2-glycoprotein OS=Homo sapiens GN=AZGP1 PE=1 SV=2	29.8658	6.05		7	4	5	1	7	28	IsMasterProtein	34.237	298			3800000			3400000	11000000	15000000			4500000				10000000		26000000		15000000	1000000
P10643	Lineal	0.902322	0.940264	-1.19572	Complement component C7 OS=Homo sapiens GN=C7 PE=1 SV=2	4.27046	6.48		1	8	1	1	3	15	IsMasterProtein	93.457	843		260000000		900000000	1000000000	25000000	9000000	26000000	160000000	23000000									180000000
P02649	Lineal	0.91656	0.940264	1.06581	Apolipoprotein E OS=Homo sapiens GN=APOE PE=1 SV=1	72.2397	5.73		24	10	10	1	25	793	IsMasterProtein	36.132	317	530000000	620000000	440000000	2700000000	5400000000	3100000000	770000000	1400000000	6800000000	2500000000	980000000	320000000	710000000	11000000	650000000	1300000000	1700000000	2700000000	7100000000	2500000000
Q92954	Censurados	0.964983	0.974173	-0.0521425	Proteoglycan 4 OS=Homo sapiens GN=PRG4 PE=1 SV=2	12.7493	9.5		10	10	9	1	15	174	IsMasterProtein	150.984	1404	12000000	10000000	13000000	77000000	340000000	180000000	29000000	99000000	460000000	150000000	8900000	3900000	13000000		28000000	62000000	27000000	140000000	280000000	97000000
P04075	Lineal	NA	NA	NA	Fructose-bisphosphate aldolase A OS=Homo sapiens GN=ALDOA PE=1 SV=2	20.8791	8.09		1	0	2	1	7	17	IsMasterProtein	39.395	364											2200000				12000000
P04899	Lineal	NA	NA	NA	Guanine nucleotide-binding protein G(i) subunit alpha-2 OS=Homo sapiens GN=GNAI2 PE=1 SV=3	3.66197	5.54		1	0	2	1	1	2	IsMasterProtein	40.425	355											4500000									2000000
P09972	Lineal	NA	NA	NA	Fructose-bisphosphate aldolase C OS=Homo sapiens GN=ALDOC PE=1 SV=2	10.1648	6.87		1	0	2	1	3	12	IsMasterProtein	39.431	364											2100000				4900000
P31645	Lineal	NA	NA	NA	Sodium-dependent serotonin transporter OS=Homo sapiens GN=SLC6A4 PE=1 SV=1	2.53968	6.25		1	0	2	1	1	2	IsMasterProtein	70.279	630											3500000		1500000
P32119	Lineal	NA	NA	NA	Peroxiredoxin-2 OS=Homo sapiens GN=PRDX2 PE=1 SV=5	26.2626	5.97		1	0	2	1	3	4	IsMasterProtein	21.878	198											2000000				19000000
P48634	Lineal	NA	NA	NA	Protein PRRC2A OS=Homo sapiens GN=PRRC2A PE=1 SV=3	0.324525	9.45		1	0	2	1	1	2	IsMasterProtein	228.724	2157												11000000			4100000
P60953	Lineal	NA	NA	NA	Cell division control protein 42 homolog OS=Homo sapiens GN=CDC42 PE=1 SV=2	8.90052	6.55		1	0	2	1	1	3	IsMasterProtein	21.245	191											2000000									1100000
Q53RT3	Lineal	NA	NA	NA	Retroviral-like aspartic protease 1 OS=Homo sapiens GN=ASPRV1 PE=1 SV=1	3.79009	5.44		1	0	2	1	1	2	IsMasterProtein	36.968	343											2200000				7100000
P22891	Lineal	NA	NA	NA	Vitamin K-dependent protein Z OS=Homo sapiens GN=PROZ PE=1 SV=2	2.5	5.97		1	2	0	1	1	3	IsMasterProtein	44.715	400							1500000	2300000
Q03154	Lineal	NA	NA	NA	Aminoacylase-1 OS=Homo sapiens GN=ACY1 PE=1 SV=1	4.90196	6.18		1	2	0	1	1	2	IsMasterProtein	45.856	408				5400000					1500000
P15918	Lineal	NA	NA	NA	V(D)J recombination-activating protein 1 OS=Homo sapiens GN=RAG1 PE=1 SV=2	1.15053	8.68		1	3	0	1	1	3	IsMasterProtein	119.02	1043		20000000	15000000			34000000
P23470	Lineal	NA	NA	NA	Receptor-type tyrosine-protein phosphatase gamma OS=Homo sapiens GN=PTPRG PE=1 SV=4	1.03806	6.42		1	3	0	1	1	4	IsMasterProtein	161.901	1445							1100000	4300000		2100000
Q9NZL6	Lineal	NA	NA	NA	Ral guanine nucleotide dissociation stimulator-like 1 OS=Homo sapiens GN=RGL1 PE=1 SV=1	1.17188	6.09		1	3	0	1	1	3	IsMasterProtein	86.646	768			5700000				13000000	28000000
Q03591	Lineal	NA	NA	NA	Complement factor H-related protein 1 OS=Homo sapiens GN=CFHR1 PE=1 SV=2	12.7273	7.39		1	5	0	1	4	35	IsMasterProtein	37.626	330					16000000	8400000	3000000	23000000	40000000
O95954	Lineal	NA	NA	NA	Formimidoyltransferase-cyclodeaminase OS=Homo sapiens GN=FTCD PE=1 SV=2	6.4695	5.74		2	1	0	1	2	2	IsMasterProtein	58.889	541				3600000
P01834	Lineal	NA	NA	NA	Ig kappa chain C region OS=Homo sapiens GN=IGKC PE=1 SV=1	32.0755	5.87		2	0	2	1	2	3	IsMasterProtein	11.602	106											3900000				6300000
P03951	Lineal	NA	NA	NA	Coagulation factor XI OS=Homo sapiens GN=F11 PE=1 SV=1	2.24	8.1		2	1	0	1	2	2	IsMasterProtein	70.064	625									16000000
P05090	Lineal	NA	NA	NA	Apolipoprotein D OS=Homo sapiens GN=APOD PE=1 SV=1	13.2275	5.15		2	0	1	1	2	3	IsMasterProtein	21.262	189															8200000
P06744	Lineal	NA	NA	NA	Glucose-6-phosphate isomerase OS=Homo sapiens GN=GPI PE=1 SV=4	3.94265	8.32		2	0	1	1	2	2	IsMasterProtein	63.107	558															1300000
P07360	Lineal	NA	NA	NA	Complement component C8 gamma chain OS=Homo sapiens GN=C8G PE=1 SV=3	16.3366	8.31		2	2	0	1	2	2	IsMasterProtein	22.264	202					3700000		1600000
P07686	Lineal	NA	NA	NA	Beta-hexosaminidase subunit beta OS=Homo sapiens GN=HEXB PE=1 SV=3	4.13669	6.76		2	0	1	1	2	2	IsMasterProtein	63.071	556															1600000
P07919	Lineal	NA	NA	NA	Cytochrome b-c1 complex subunit 6, mitochondrial OS=Homo sapiens GN=UQCRH PE=1 SV=2	27.4725	4.44		2	0	1	1	2	2	IsMasterProtein	10.732	91															4800000
P09211	Lineal	NA	NA	NA	Glutathione S-transferase P OS=Homo sapiens GN=GSTP1 PE=1 SV=2	10	5.64		2	0	1	1	2	2	IsMasterProtein	23.341	210															12000000
P09429	Lineal	NA	NA	NA	High mobility group protein B1 OS=Homo sapiens GN=HMGB1 PE=1 SV=3	10.2326	5.74		2	0	1	1	2	2	IsMasterProtein	24.878	215											10000000
P10809	Lineal	NA	NA	NA	60 kDa heat shock protein, mitochondrial OS=Homo sapiens GN=HSPD1 PE=1 SV=2	6.45724	5.87		2	0	1	1	2	2	IsMasterProtein	61.016	573															1500000
P15104	Lineal	NA	NA	NA	Glutamine synthetase OS=Homo sapiens GN=GLUL PE=1 SV=4	7.23861	6.89	Acetyl [N-Term]	2	0	1	1	2	2	IsMasterProtein	42.037	373															10000000
P15309	Lineal	NA	NA	NA	Prostatic acid phosphatase OS=Homo sapiens GN=ACPP PE=1 SV=3	7.77202	6.24		2	0	1	1	2	2	IsMasterProtein	44.537	386															3900000
P19971	Lineal	NA	NA	NA	Thymidine phosphorylase OS=Homo sapiens GN=TYMP PE=1 SV=2	7.05394	5.53		2	0	1	1	2	2	IsMasterProtein	49.924	482											650000
P22528	Lineal	NA	NA	NA	Cornifin-B OS=Homo sapiens GN=SPRR1B PE=1 SV=2	34.8315	8.48		2	0	1	1	2	2	IsMasterProtein	9.881	89															6200000
P22695	Lineal	NA	NA	NA	Cytochrome b-c1 complex subunit 2, mitochondrial OS=Homo sapiens GN=UQCRC2 PE=1 SV=3	6.40177	8.63		2	0	1	1	2	2	IsMasterProtein	48.413	453															1700000
P27105	Lineal	NA	NA	NA	Erythrocyte band 7 integral membrane protein OS=Homo sapiens GN=STOM PE=1 SV=3	8.33333	7.88		2	0	2	1	2	4	IsMasterProtein	31.711	288											1800000									2400000
P35232	Lineal	NA	NA	NA	Prohibitin OS=Homo sapiens GN=PHB PE=1 SV=1	8.82353	5.76		2	0	1	1	2	2	IsMasterProtein	29.786	272															2800000
P35268	Lineal	NA	NA	NA	60S ribosomal protein L22 OS=Homo sapiens GN=RPL22 PE=1 SV=2	18.75	9.19		2	0	1	1	2	2	IsMasterProtein	14.778	128															2100000
P36955	Lineal	NA	NA	NA	Pigment epithelium-derived factor OS=Homo sapiens GN=SERPINF1 PE=1 SV=4	7.41627	6.38		2	0	1	1	2	2	IsMasterProtein	46.283	418																	3100000
P38646	Lineal	NA	NA	NA	Stress-70 protein, mitochondrial OS=Homo sapiens GN=HSPA9 PE=1 SV=2	3.09278	6.16		2	0	1	1	2	2	IsMasterProtein	73.635	679															1300000
P49419	Lineal	NA	NA	NA	Alpha-aminoadipic semialdehyde dehydrogenase OS=Homo sapiens GN=ALDH7A1 PE=1 SV=5	6.30798	7.99		2	0	1	1	2	2	IsMasterProtein	58.45	539															360000
P49755	Lineal	NA	NA	NA	Transmembrane emp24 domain-containing protein 10 OS=Homo sapiens GN=TMED10 PE=1 SV=2	9.58904	7.44		2	0	1	1	2	3	IsMasterProtein	24.96	219															1100000
P53634	Lineal	NA	NA	NA	Dipeptidyl peptidase 1 OS=Homo sapiens GN=CTSC PE=1 SV=2	9.28726	6.99		2	0	1	1	2	3	IsMasterProtein	51.82	463															4700000
P55084	Lineal	NA	NA	NA	Trifunctional enzyme subunit beta, mitochondrial OS=Homo sapiens GN=HADHB PE=1 SV=3	4.85232	9.41		2	0	1	1	2	2	IsMasterProtein	51.262	474															2800000
P62820	Lineal	NA	NA	NA	Ras-related protein Rab-1A OS=Homo sapiens GN=RAB1A PE=1 SV=3	17.561	6.21		2	0	1	1	3	3	IsMasterProtein	22.663	205											1500000
P68366	Lineal	NA	NA	NA	Tubulin alpha-4A chain OS=Homo sapiens GN=TUBA4A PE=1 SV=1	17.6339	5.06		2	0	2	1	6	16	IsMasterProtein	49.892	448											3600000				3100000
P83881	Lineal	NA	NA	NA	60S ribosomal protein L36a OS=Homo sapiens GN=RPL36A PE=1 SV=2	15.0943	10.58		2	0	2	1	2	3	IsMasterProtein	12.433	106											3800000						5900000
Q06830	Lineal	NA	NA	NA	Peroxiredoxin-1 OS=Homo sapiens GN=PRDX1 PE=1 SV=1	15.5779	8.13		2	0	2	1	3	3	IsMasterProtein	22.096	199											12000000				2600000
Q6NUJ1	Lineal	NA	NA	NA	Proactivator polypeptide-like 1 OS=Homo sapiens GN=PSAPL1 PE=2 SV=2	5.75816	7.27		2	0	1	1	2	3	IsMasterProtein	56.589	521															16000000
Q7L5L3	Lineal	NA	NA	NA	Glycerophosphodiester phosphodiesterase domain-containing protein 3 OS=Homo sapiens GN=GDPD3 PE=2 SV=3	8.1761	7.97		2	0	1	1	2	2	IsMasterProtein	36.573	318															5600000
Q8WVV4	Lineal	NA	NA	NA	Protein POF1B OS=Homo sapiens GN=POF1B PE=1 SV=3	3.73514	6.32		2	0	2	1	2	3	IsMasterProtein	68.022	589											2100000				5300000
Q96FQ6	Lineal	NA	NA	NA	Protein S100-A16 OS=Homo sapiens GN=S100A16 PE=1 SV=1	29.1262	6.79		2	0	1	1	2	2	IsMasterProtein	11.794	103															4400000
Q96IY4	Lineal	NA	NA	NA	Carboxypeptidase B2 OS=Homo sapiens GN=CPB2 PE=1 SV=2	11.5839	7.71		2	1	0	1	4	7	IsMasterProtein	48.393	423								10000000
Q96P63	Lineal	NA	NA	NA	Serpin B12 OS=Homo sapiens GN=SERPINB12 PE=1 SV=1	8.14815	5.53		2	0	2	1	2	2	IsMasterProtein	46.247	405											530000				4700000
Q99798	Lineal	NA	NA	NA	Aconitate hydratase, mitochondrial OS=Homo sapiens GN=ACO2 PE=1 SV=2	3.97436	7.61		2	0	1	1	2	2	IsMasterProtein	85.372	780															3100000
Q9NZP8	Lineal	NA	NA	NA	Complement C1r subcomponent-like protein OS=Homo sapiens GN=C1RL PE=1 SV=2	10.2669	7.2		2	3	0	1	4	36	IsMasterProtein	53.464	487					3500000			3900000	4400000
O60911	Lineal	NA	NA	NA	Cathepsin L2 OS=Homo sapiens GN=CTSV PE=1 SV=2	14.0719	8.76		3	0	1	1	3	3	IsMasterProtein	37.305	334															11000000
P00338	Lineal	NA	NA	NA	L-lactate dehydrogenase A chain OS=Homo sapiens GN=LDHA PE=1 SV=2	19.2771	8.27		3	0	3	1	5	9	IsMasterProtein	36.665	332											1800000	670000			5200000
P00441	Lineal	NA	NA	NA	Superoxide dismutase [Cu-Zn] OS=Homo sapiens GN=SOD1 PE=1 SV=2	32.4675	6.13		3	0	1	1	3	3	IsMasterProtein	15.926	154															7700000
P00558	Lineal	NA	NA	NA	Phosphoglycerate kinase 1 OS=Homo sapiens GN=PGK1 PE=1 SV=3	11.0312	8.1		3	0	1	1	3	3	IsMasterProtein	44.586	417															3700000
P01040	Lineal	NA	NA	NA	Cystatin-A OS=Homo sapiens GN=CSTA PE=1 SV=1	38.7755	5.5		3	0	5	1	3	9	IsMasterProtein	11	98											14000000	1600000			25000000		1900000	8900000
P04040	Lineal	NA	NA	NA	Catalase OS=Homo sapiens GN=CAT PE=1 SV=3	7.02087	7.39		3	0	2	1	3	5	IsMasterProtein	59.719	527											2600000				2900000
P04080	Lineal	NA	NA	NA	Cystatin-B OS=Homo sapiens GN=CSTB PE=1 SV=2	48.9796	7.56	Acetyl [N-Term]	3	0	1	1	3	3	IsMasterProtein	11.133	98															17000000
P04083	Lineal	NA	NA	NA	Annexin A1 OS=Homo sapiens GN=ANXA1 PE=1 SV=2	12.4277	7.02		3	0	1	1	3	4	IsMasterProtein	38.69	346															2000000
P05023	Lineal	NA	NA	NA	Sodium/potassium-transporting ATPase subunit alpha-1 OS=Homo sapiens GN=ATP1A1 PE=1 SV=1	3.0303	5.49		3	0	1	1	3	3	IsMasterProtein	112.824	1023											1700000
P06396	Lineal	NA	NA	NA	Gelsolin OS=Homo sapiens GN=GSN PE=1 SV=1	22.1228	6.28		3	0	1	1	12	81	IsMasterProtein	85.644	782															2100000
P09525	Lineal	NA	NA	NA	Annexin A4 OS=Homo sapiens GN=ANXA4 PE=1 SV=4	13.4796	6.13		3	0	1	1	3	3	IsMasterProtein	35.86	319															4100000
P10619	Lineal	NA	NA	NA	Lysosomal protective protein OS=Homo sapiens GN=CTSA PE=1 SV=2	9.79167	6.61		3	0	1	1	3	4	IsMasterProtein	54.431	480															5400000
P12429	Lineal	NA	NA	NA	Annexin A3 OS=Homo sapiens GN=ANXA3 PE=1 SV=3	10.8359	5.92	Acetyl [N-Term]	3	0	1	1	3	3	IsMasterProtein	36.353	323															1300000
P13639	Lineal	NA	NA	NA	Elongation factor 2 OS=Homo sapiens GN=EEF2 PE=1 SV=4	5.82751	6.83		3	0	1	1	3	3	IsMasterProtein	95.277	858															9100000
P13928	Lineal	NA	NA	NA	Annexin A8 OS=Homo sapiens GN=ANXA8 PE=1 SV=3	11.315	5.78		3	0	1	1	3	3	IsMasterProtein	36.858	327															3300000
P15169	Lineal	NA	NA	NA	Carboxypeptidase N catalytic chain OS=Homo sapiens GN=CPN1 PE=1 SV=1	12.0087	7.34		3	4	0	1	5	27	IsMasterProtein	52.253	458			2700000	6000000	11000000		3200000
P40939	Lineal	NA	NA	NA	Trifunctional enzyme subunit alpha, mitochondrial OS=Homo sapiens GN=HADHA PE=1 SV=2	7.20839	9.04		3	0	1	1	3	3	IsMasterProtein	82.947	763															1400000
P48594	Lineal	NA	NA	NA	Serpin B4 OS=Homo sapiens GN=SERPINB4 PE=1 SV=2	29.4872	6.21		3	0	2	1	9	16	IsMasterProtein	44.825	390											13000000				7500000
P55072	Lineal	NA	NA	NA	Transitional endoplasmic reticulum ATPase OS=Homo sapiens GN=VCP PE=1 SV=4	5.45906	5.26		3	0	2	1	3	4	IsMasterProtein	89.266	806											480000				1800000
P62158	Lineal	NA	NA	NA	Calmodulin OS=Homo sapiens GN=CALM1 PE=1 SV=2	26.1745	4.22	Acetyl [N-Term]	3	0	8	1	4	19	IsMasterProtein	16.827	149											14000000	4200000	6800000		23000000	1500000		6600000	7300000	11000000
P67936	Lineal	NA	NA	NA	Tropomyosin alpha-4 chain OS=Homo sapiens GN=TPM4 PE=1 SV=3	16.9355	4.69		3	0	1	1	4	4	IsMasterProtein	28.504	248															4700000
Q08554	Lineal	NA	NA	NA	Desmocollin-1 OS=Homo sapiens GN=DSC1 PE=1 SV=2	4.69799	5.43		3	0	5	1	3	10	IsMasterProtein	99.924	894											28000000	2000000						18000000	8700000	12000000
Q6GTS8	Lineal	NA	NA	NA	N-fatty-acyl-amino acid synthase/hydrolase PM20D1 OS=Homo sapiens GN=PM20D1 PE=1 SV=3	7.37052	6.67		3	0	1	1	3	3	IsMasterProtein	55.706	502															4500000
Q6UWP8	Lineal	NA	NA	NA	Suprabasin OS=Homo sapiens GN=SBSN PE=1 SV=2	7.79661	7.01		3	0	1	1	3	3	IsMasterProtein	60.505	590											4000000
Q6ZVX7	Lineal	NA	NA	NA	F-box only protein 50 OS=Homo sapiens GN=NCCRP1 PE=1 SV=1	17.8182	6.62		3	0	2	1	3	5	IsMasterProtein	30.828	275											2000000				8200000
P01857	Lineal	NA	NA	NA	Ig gamma-1 chain C region OS=Homo sapiens GN=IGHG1 PE=1 SV=1	19.3939	8.19		4	0	2	1	4	7	IsMasterProtein	36.083	330											5400000				45000000
P04180	Lineal	NA	NA	NA	Phosphatidylcholine-sterol acyltransferase OS=Homo sapiens GN=LCAT PE=1 SV=1	20.6818	6.11		4	5	0	1	5	13	IsMasterProtein	49.546	440					11000000	6200000	3300000		16000000	1500000
P06681	Lineal	NA	NA	NA	Complement C2 OS=Homo sapiens GN=C2 PE=1 SV=2	6.11702	7.42		4	3	0	1	4	6	IsMasterProtein	83.214	752						1300000	2500000	5100000
P07858	Lineal	NA	NA	NA	Cathepsin B OS=Homo sapiens GN=CTSB PE=1 SV=3	15.0442	6.3		4	0	1	1	4	4	IsMasterProtein	37.797	339															16000000
P12273	Lineal	NA	NA	NA	Prolactin-inducible protein OS=Homo sapiens GN=PIP PE=1 SV=1	32.1918	8.05		4	0	4	1	4	6	IsMasterProtein	16.562	146											5700000				1700000			2800000		3900000
P17900	Lineal	NA	NA	NA	Ganglioside GM2 activator OS=Homo sapiens GN=GM2A PE=1 SV=4	22.2798	5.31		4	0	2	1	4	5	IsMasterProtein	20.825	193											1100000				22000000
P21796	Lineal	NA	NA	NA	Voltage-dependent anion-selective channel protein 1 OS=Homo sapiens GN=VDAC1 PE=1 SV=2	19.4346	8.54		4	0	2	1	4	6	IsMasterProtein	30.754	283											1600000				5500000
P26038	Lineal	NA	NA	NA	Moesin OS=Homo sapiens GN=MSN PE=1 SV=3	10.9185	6.4		4	0	4	1	6	36	IsMasterProtein	67.778	577											2700000	510000			950000			1100000
P27482	Lineal	NA	NA	NA	Calmodulin-like protein 3 OS=Homo sapiens GN=CALML3 PE=1 SV=2	36.9128	4.42		4	0	1	1	5	5	IsMasterProtein	16.88	149															37000000
P31947	Lineal	NA	NA	NA	14-3-3 protein sigma OS=Homo sapiens GN=SFN PE=1 SV=1	37.9032	4.74		4	0	2	1	8	25	IsMasterProtein	27.757	248											22000000				25000000
P31949	Lineal	NA	NA	NA	Protein S100-A11 OS=Homo sapiens GN=S100A11 PE=1 SV=2	62.8571	7.12		4	0	1	1	4	4	IsMasterProtein	11.733	105															13000000
P49748	Lineal	NA	NA	NA	Very long-chain specific acyl-CoA dehydrogenase, mitochondrial OS=Homo sapiens GN=ACADVL PE=1 SV=1	8.85496	8.75		4	0	1	1	4	4	IsMasterProtein	70.345	655															3500000
P62258	Lineal	NA	NA	NA	14-3-3 protein epsilon OS=Homo sapiens GN=YWHAE PE=1 SV=1	30.9804	4.74		4	0	3	1	7	24	IsMasterProtein	29.155	255											4600000				3100000					580000
Q09666	Lineal	NA	NA	NA	Neuroblast differentiation-associated protein AHNAK OS=Homo sapiens GN=AHNAK PE=1 SV=2	4.4652	6.15		4	0	2	1	4	5	IsMasterProtein	628.699	5890											1300000				6400000
Q13835	Lineal	NA	NA	NA	Plakophilin-1 OS=Homo sapiens GN=PKP1 PE=1 SV=2	8.5676	9.13		4	0	3	1	4	6	IsMasterProtein	82.808	747											2500000				5800000					890000
Q15149	Lineal	NA	NA	NA	Plectin OS=Homo sapiens GN=PLEC PE=1 SV=3	0.960717	5.96		4	0	1	1	4	4	IsMasterProtein	531.466	4684															1300000
Q9HCY8	Lineal	NA	NA	NA	Protein S100-A14 OS=Homo sapiens GN=S100A14 PE=1 SV=1	46.1538	5.24		4	0	2	1	4	5	IsMasterProtein	11.655	104											2000000				15000000
Q9UHG3	Lineal	NA	NA	NA	Prenylcysteine oxidase 1 OS=Homo sapiens GN=PCYOX1 PE=1 SV=3	16.2376	6.18		4	3	0	1	5	14	IsMasterProtein	56.604	505					8500000	4300000		3400000
Q9Y6N5	Lineal	NA	NA	NA	Sulfide:quinone oxidoreductase, mitochondrial OS=Homo sapiens GN=SQRDL PE=1 SV=1	11.1111	9.11		4	0	1	1	4	4	IsMasterProtein	49.929	450															2000000
O43707	Lineal	NA	NA	NA	Alpha-actinin-4 OS=Homo sapiens GN=ACTN4 PE=1 SV=2	13.6114	5.44		5	0	2	1	10	10	IsMasterProtein	104.788	911											1000000				8100000
P07358	Lineal	NA	NA	NA	Complement component C8 beta chain OS=Homo sapiens GN=C8B PE=1 SV=3	8.62944	8.13		5	5	0	1	5	15	IsMasterProtein	67.003	591					2900000	4100000	3000000	8100000	9300000
P07476	Lineal	NA	NA	NA	Involucrin OS=Homo sapiens GN=IVL PE=1 SV=2	12.3077	4.61		5	0	1	1	5	5	IsMasterProtein	68.437	585															18000000
P18669	Lineal	NA	NA	NA	Phosphoglycerate mutase 1 OS=Homo sapiens GN=PGAM1 PE=1 SV=2	34.252	7.18		5	0	2	1	5	7	IsMasterProtein	28.786	254											700000				5400000
P31944	Lineal	NA	NA	NA	Caspase-14 OS=Homo sapiens GN=CASP14 PE=1 SV=2	23.9669	5.58		5	0	3	1	5	9	IsMasterProtein	27.662	242											3000000				9700000			4900000
P04792	Lineal	NA	NA	NA	Heat shock protein beta-1 OS=Homo sapiens GN=HSPB1 PE=1 SV=2	45.3659	6.4		6	0	2	1	6	7	IsMasterProtein	22.768	205											10000000				24000000
P29508	Lineal	NA	NA	NA	Serpin B3 OS=Homo sapiens GN=SERPINB3 PE=1 SV=2	39.4872	6.81		6	0	1	1	12	17	IsMasterProtein	44.537	390															20000000
P40926	Lineal	NA	NA	NA	Malate dehydrogenase, mitochondrial OS=Homo sapiens GN=MDH2 PE=1 SV=3	27.2189	8.68		6	0	1	1	6	6	IsMasterProtein	35.481	338															6500000
P47929	Lineal	NA	NA	NA	Galectin-7 OS=Homo sapiens GN=LGALS7 PE=1 SV=2	60.2941	7.62		6	0	3	1	6	14	IsMasterProtein	15.066	136											33000000				37000000			2000000
P05089	Lineal	NA	NA	NA	Arginase-1 OS=Homo sapiens GN=ARG1 PE=1 SV=2	36.3354	7.21		7	0	2	1	7	8	IsMasterProtein	34.713	322											2200000				9500000
P20930	Lineal	NA	NA	NA	Filaggrin OS=Homo sapiens GN=FLG PE=1 SV=3	2.43782	9.25		7	0	4	1	7	13	IsMasterProtein	434.922	4061											3100000				6500000			2900000		640000
P45880	Lineal	NA	NA	NA	Voltage-dependent anion-selective channel protein 2 OS=Homo sapiens GN=VDAC2 PE=1 SV=2	32.6531	7.56		7	0	1	1	7	7	IsMasterProtein	31.547	294															9500000
Q7Z406	Lineal	NA	NA	NA	Myosin-14 OS=Homo sapiens GN=MYH14 PE=1 SV=2	7.26817	5.6		7	0	1	1	11	15	IsMasterProtein	227.732	1995															2300000
P22735	Lineal	NA	NA	NA	Protein-glutamine gamma-glutamyltransferase K OS=Homo sapiens GN=TGM1 PE=1 SV=4	12.1175	6.04		8	0	1	1	8	8	IsMasterProtein	89.73	817															6600000
P68871	Lineal	NA	NA	NA	Hemoglobin subunit beta OS=Homo sapiens GN=HBB PE=1 SV=2	67.3469	7.28		8	0	1	1	10	32	IsMasterProtein	15.988	147																		140000000
P06576	Lineal	NA	NA	NA	ATP synthase subunit beta, mitochondrial OS=Homo sapiens GN=ATP5B PE=1 SV=3	25.7089	5.4		9	0	1	1	9	12	IsMasterProtein	56.525	529															15000000
P25705	Lineal	NA	NA	NA	ATP synthase subunit alpha, mitochondrial OS=Homo sapiens GN=ATP5A1 PE=1 SV=1	21.519	9.13		9	0	1	1	9	10	IsMasterProtein	59.714	553															11000000
P60174	Lineal	NA	NA	NA	Triosephosphate isomerase OS=Homo sapiens GN=TPI1 PE=1 SV=3	51.3986	5.92		9	0	2	1	9	11	IsMasterProtein	30.772	286											1800000				14000000
Q5T749	Lineal	NA	NA	NA	Keratinocyte proline-rich protein OS=Homo sapiens GN=KPRP PE=1 SV=1	27.4611	8.27		9	0	3	1	9	10	IsMasterProtein	64.093	579											8300000	3500000			17000000
Q9BYE9	Lineal	NA	NA	NA	Cadherin-related family member 2 OS=Homo sapiens GN=CDHR2 PE=1 SV=2	9.46565	4.5		9	2	0	1	9	12	IsMasterProtein	141.455	1310					4800000	7700000
P07339	Lineal	NA	NA	NA	Cathepsin D OS=Homo sapiens GN=CTSD PE=1 SV=1	42.9612	6.54		11	0	1	1	11	22	IsMasterProtein	44.524	412															78000000
Q02413	Lineal	NA	NA	NA	Desmoglein-1 OS=Homo sapiens GN=DSG1 PE=1 SV=2	18.8751	5.03		13	0	4	1	13	26	IsMasterProtein	113.676	1049											21000000				10000000			3900000		2500000
P07355	Lineal	NA	NA	NA	Annexin A2 OS=Homo sapiens GN=ANXA2 PE=1 SV=2	45.1327	7.75	Acetyl [N-Term]	15	0	6	1	15	32	IsMasterProtein	38.58	339											13000000	710000			47000000			3700000	2600000	3900000
A8K2U0	Lineal	NA	NA	NA	Alpha-2-macroglobulin-like protein 1 OS=Homo sapiens GN=A2ML1 PE=1 SV=3	16.9876	5.73		17	0	1	1	17	18	IsMasterProtein	161.004	1454															18000000
P14923	Lineal	NA	NA	NA	Junction plakoglobin OS=Homo sapiens GN=JUP PE=1 SV=3	40	6.14		21	0	6	1	21	52	IsMasterProtein	81.693	745											17000000			770000	19000000			12000000	6600000	12000000
P15924	Lineal	NA	NA	NA	Desmoplakin OS=Homo sapiens GN=DSP PE=1 SV=3	24.6952	6.81		60	0	6	1	60	112	IsMasterProtein	331.569	2871											23000000	860000			25000000			15000000	5400000	13000000
A6NIZ1	Lineal	NA	NA	NA	Ras-related protein Rap-1b-like protein OS=Homo sapiens PE=2 SV=1	22.8261	5.48		4	0	9	1	4	18	IsMasterProtein	20.912	184											18000000	7500000	3300000		3700000	4100000	5700000	6400000	3700000	33000000

## Sheet: Table 2
Table 2. Statistical analysis of H. sapiens proteins identified in the ExEFs of infected and uninfected mice from Experimental infection 1. Protein abundance data was estimated from the average peak area of the 3 top peptides for a given protein. Censured and lineal statistical methods were applied for statistical comparison between infected versus uninfected mice. Proteins with statistically sig…																ExEF
																Control M4 (CM4)	Control M3 (CM3)	Control M2 (CM2)	Control M1 (CM1)	Day 86 M6 (IM6)	Day 85 M5 (IM5)	Day 84 M4 (IM4)	Day 83 M3 (IM3)	Day 82 M2 (IM2)	Day 81 M1 (IM1)
Accession	Statistic method applied	P.value	adj.P.val	FC	Description	Coverage	calc. pI	Modifications	# Protein Groups	# Unique Peptides	# Peptides	# PSMs	Master	MW [kDa]	# AAs	170123_S_JSHP_20	170123_S_JSHP_18	170123_S_JSHP_16	170123_S_JSHP_14	170123_S_JSHP_12	170123_S_JSHP_10	170123_S_JSHP_08	170123_S_JSHP_06	170123_S_JSHP_04	170123_S_JSHP_02
P04004	Censurado	6.18262e-06	0.000216392	9.83168	Vitronectin OS=Homo sapiens GN=VTN PE=1 SV=1	37.2385	5.8		1	11	14	121	IsMasterProtein	54.271	478			6800000		8000000	16000000	88000000	170000000	110000000	58000000
P08603	Censurado	1.13205e-05	0.000264146	9.70811	Complement factor H OS=Homo sapiens GN=CFH PE=1 SV=4	46.1413	6.61		1	42	44	528	IsMasterProtein	139.005	1231			8000000		8800000	27000000	110000000	170000000	97000000	31000000
P04196	Censurado	1.77166e-05	0.000282379	8.4817	Histidine-rich glycoprotein OS=Homo sapiens GN=HRG PE=1 SV=1	35.8095	7.5		1	16	16	262	IsMasterProtein	59.541	525	3600000		9300000		27000000	60000000	320000000	530000000	150000000	84000000
P0C0L5	Censurado	2.01699e-05	0.000282379	8.04159	Complement C4-B OS=Homo sapiens GN=C4B PE=1 SV=2	56.0206	7.27		1	4	69	661	IsMasterProtein	192.631	1744			3700000		9900000	17000000	12000000	20000000	28000000	3800000
P02774	Censurado	3.5028e-05	0.000408659	7.59979	Vitamin D-binding protein OS=Homo sapiens GN=GC PE=1 SV=1	70.8861	5.54		1	17	23	162	IsMasterProtein	52.929	474			450000		780000	2700000	140000000	10000000	3600000	5000000
P01042	Censurado	6.11451e-05	0.000611451	7.69846	Kininogen-1 OS=Homo sapiens GN=KNG1 PE=1 SV=2	40.528	6.81		1	20	21	204	IsMasterProtein	71.912	644	6300000		2900000		10000000	26000000	310000000	180000000	100000000	41000000
P02749	Censurado	0.000169504	0.00148316	7.12013	Beta-2-glycoprotein 1 OS=Homo sapiens GN=APOH PE=1 SV=3	35.0725	7.97		1	9	9	60	IsMasterProtein	38.273	345	2300000				1200000	2800000	74000000	12000000	11000000	4800000
P22792	Censurado	0.00019758	0.00153673	8.30796	Carboxypeptidase N subunit 2 OS=Homo sapiens GN=CPN2 PE=1 SV=3	51.9266	5.99		1	15	15	141	IsMasterProtein	60.518	545			8400000		3500000	12000000	36000000	41000000	28000000	15000000
P02655	Lineal	0.000463251	0.0273318	-11.6135	Apolipoprotein C-II OS=Homo sapiens GN=APOC2 PE=1 SV=1	59.4059	4.72		1	13	13	160	IsMasterProtein	11.277	101	4000000000	1900000000	4200000000	470000000	260000000	420000000	1100000000	3500000000	1600000000	570000000
P01008	Censurado	0.000928593	0.00590923	7.49202	Antithrombin-III OS=Homo sapiens GN=SERPINC1 PE=1 SV=1	45.2586	6.71		1	13	22	299	IsMasterProtein	52.569	464			6400000		2000000	2900000	54000000	35000000	12000000	7000000
P19652	Censurado	0.00467657	0.02728	9.43039	Alpha-1-acid glycoprotein 2 OS=Homo sapiens GN=ORM2 PE=1 SV=2	40.2985	5.11		1	6	8	97	IsMasterProtein	23.588	201	590000					8000000	110000000	44000000	16000000	12000000
P02760	Censurado	0.00527534	0.0284057	5.74367	Protein AMBP OS=Homo sapiens GN=AMBP PE=1 SV=1	32.9545	6.25		1	10	10	127	IsMasterProtein	38.974	352	5100000		8700000		4600000	19000000	100000000	16000000	36000000	10000000
Q92954	Censurado	0.00612253	0.0288653	4.78409	Proteoglycan 4 OS=Homo sapiens GN=PRG4 PE=1 SV=2	12.7493	9.5		1	10	15	174	IsMasterProtein	150.984	1404	8900000	3900000	13000000		28000000	62000000	27000000	140000000	280000000	97000000
P12259	Censurado	0.00926771	0.0405462	3.99571	Coagulation factor V OS=Homo sapiens GN=F5 PE=1 SV=4	26.3489	6.05		1	36	49	371	IsMasterProtein	251.546	2224	5100000	2200000	6300000		10000000	5200000	24000000	110000000	33000000	33000000
P02649	Lineal	0.00936843	0.276369	13.222	Apolipoprotein E OS=Homo sapiens GN=APOE PE=1 SV=1	72.2397	5.73		1	24	25	793	IsMasterProtein	36.132	317	980000000	320000000	710000000	11000000	650000000	1300000000	1700000000	2700000000	7100000000	2500000000
P20851	Censurado	0.0144257	0.0570408	4.3544	C4b-binding protein beta chain OS=Homo sapiens GN=C4BPB PE=1 SV=1	53.5714	5.14		1	11	11	138	IsMasterProtein	28.338	252	6600000	1700000	30000000		7900000	26000000	47000000	55000000	160000000	120000000
P19823	Censurado	0.0146676	0.0570408	5.68672	Inter-alpha-trypsin inhibitor heavy chain H2 OS=Homo sapiens GN=ITIH2 PE=1 SV=2	51.5856	6.86		1	25	37	377	IsMasterProtein	106.397	946	8900000		13000000		4500000	11000000	97000000	60000000	83000000	14000000
P08697	Censurado	0.0173836	0.0640447	8.73228	Alpha-2-antiplasmin OS=Homo sapiens GN=SERPINF2 PE=1 SV=3	24.4399	6.29		1	8	9	65	IsMasterProtein	54.531	491			4200000		8700000	13000000	34000000	24000000	63000000
P02765	Censurado	0.0198535	0.0694874	8.98116	Alpha-2-HS-glycoprotein OS=Homo sapiens GN=AHSG PE=1 SV=1	42.2343	5.72		1	6	10	114	IsMasterProtein	39.3	367	3000000				2700000		300000000	40000000	24000000	8400000
P10909	Censurado	0.0260889	0.0830102	4.40334	Clusterin OS=Homo sapiens GN=CLU PE=1 SV=1	33.1849	6.27		1	15	15	179	IsMasterProtein	52.461	449	40000000	9300000	30000000		49000000	85000000	150000000	210000000	450000000	110000000
P02654	Censurado	0.0312974	0.095253	-10.8209	Apolipoprotein C-I OS=Homo sapiens GN=APOC1 PE=1 SV=1	43.3735	8.47		1	3	4	36	IsMasterProtein	9.326	83	180000000	68000000	220000000	95000000				580000000		140000000
P04114	Censurado	0.0401115	0.116992	5.09313	Apolipoprotein B-100 OS=Homo sapiens GN=APOB PE=1 SV=2	74.096	7.05		1	280	298	6181	IsMasterProtein	515.283	4563	370000000	120000000	530000000		400000000	1000000000	1300000000	1500000000	2000000000	890000000
P07225	Censurado	0.0493883	0.138287	3.97919	Vitamin K-dependent protein S OS=Homo sapiens GN=PROS1 PE=1 SV=1	39.9408	5.67		1	19	20	169	IsMasterProtein	75.074	676	33000000	2100000	39000000		38000000	25000000	45000000	160000000	140000000	54000000
P04003	Censurado	0.0595075	0.160212	4.47836	C4b-binding protein alpha chain OS=Homo sapiens GN=C4BPA PE=1 SV=2	66.6667	7.3		1	29	29	578	IsMasterProtein	66.989	597	240000000	75000000	360000000		250000000	350000000	540000000	1200000000	1300000000	470000000
P55056	Censurado	0.0644287	0.167037	6.42028	Apolipoprotein C-IV OS=Homo sapiens GN=APOC4 PE=1 SV=1	19.685	8.92		1	2	2	11	IsMasterProtein	14.543	127			7300000		3200000	12000000		8000000	7200000	2300000
P17900	Lineal	0.0683381	0.778992	80.3558	Ganglioside GM2 activator OS=Homo sapiens GN=GM2A PE=1 SV=4	22.2798	5.31		1	4	4	5	IsMasterProtein	20.825	193	1100000				22000000
P19827	Censurado	0.119262	0.280409	6.18594	Inter-alpha-trypsin inhibitor heavy chain H1 OS=Homo sapiens GN=ITIH1 PE=1 SV=3	38.7486	6.79		1	25	26	293	IsMasterProtein	101.326	911	5700000		19000000			800000000	130000000	75000000	120000000	14000000
P09871	Censurado	0.120175	0.280409	5.54823	Complement C1s subcomponent OS=Homo sapiens GN=C1S PE=1 SV=1	28.343	4.96		1	11	12	80	IsMasterProtein	76.635	688	1100000						8100000	6200000	4400000	2800000
P81605	Censurado	0.132506	0.281016	3.33517	Dermcidin OS=Homo sapiens GN=DCD PE=1 SV=2	22.7273	6.54		1	3	3	33	IsMasterProtein	11.277	110	93000000	53000000	53000000		64000000	38000000	96000000	260000000	290000000	130000000
P05155	Censurado	0.136493	0.281016	7.90105	Plasma protease C1 inhibitor OS=Homo sapiens GN=SERPING1 PE=1 SV=2	36.6	6.55		1	13	15	137	IsMasterProtein	55.119	500			5000000			6100000	110000000	36000000	23000000
O43707	Lineal	0.138266	0.778992	24.6859	Alpha-actinin-4 OS=Homo sapiens GN=ACTN4 PE=1 SV=2	13.6114	5.44		1	5	10	10	IsMasterProtein	104.788	911	1000000				8100000
P00338	Lineal	0.138422	0.778992	10.1575	L-lactate dehydrogenase A chain OS=Homo sapiens GN=LDHA PE=1 SV=2	19.2771	8.27		1	3	5	9	IsMasterProtein	36.665	332	1800000	670000			5200000
P60174	Lineal	0.140699	0.778992	24.0147	Triosephosphate isomerase OS=Homo sapiens GN=TPI1 PE=1 SV=3	51.3986	5.92		1	9	9	11	IsMasterProtein	30.772	286	1800000				14000000
P27169	Censurado	0.14662	0.29324	6.02179	Serum paraoxonase/arylesterase 1 OS=Homo sapiens GN=PON1 PE=1 SV=3	38.3099	5.22		1	8	9	59	IsMasterProtein	39.706	355	2200000					2000000	27000000	6500000	13000000
Q9HCY8	Lineal	0.147615	0.778992	22.2683	Protein S100-A14 OS=Homo sapiens GN=S100A14 PE=1 SV=1	46.1538	5.24		1	4	4	5	IsMasterProtein	11.655	104	2000000				15000000
P01857	Lineal	0.15563	0.778992	20.5014	Ig gamma-1 chain C region OS=Homo sapiens GN=IGHG1 PE=1 SV=1	19.3939	8.19		1	4	4	7	IsMasterProtein	36.083	330	5400000				45000000
Q96P63	Lineal	0.163455	0.778992	18.9968	Serpin B12 OS=Homo sapiens GN=SERPINB12 PE=1 SV=1	8.14815	5.53		1	2	2	2	IsMasterProtein	46.247	405	530000				4700000
P18669	Lineal	0.173521	0.778992	17.3217	Phosphoglycerate mutase 1 OS=Homo sapiens GN=PGAM1 PE=1 SV=2	34.252	7.18		1	5	5	7	IsMasterProtein	28.786	254	700000				5400000
O15270	Censurado	0.177727	0.345581	8.80904	Serine palmitoyltransferase 2 OS=Homo sapiens GN=SPTLC2 PE=1 SV=1	1.24555	7.78		1	1	1	17	IsMasterProtein	62.884	562	1100000000		5200000000		1500000000	2100000000	2900000000	7300000000	14000000000
P25311	Censurado	0.191958	0.363164	6.3087	Zinc-alpha-2-glycoprotein OS=Homo sapiens GN=AZGP1 PE=1 SV=2	29.8658	6.05		1	7	7	28	IsMasterProtein	34.237	298	4500000				10000000		26000000		15000000	1000000
Q09666	Lineal	0.204178	0.778992	13.5097	Neuroblast differentiation-associated protein AHNAK OS=Homo sapiens GN=AHNAK PE=1 SV=2	4.4652	6.15		1	4	4	5	IsMasterProtein	628.699	5890	1300000				6400000
Q02413	Lineal	0.216993	0.778992	-7.43509	Desmoglein-1 OS=Homo sapiens GN=DSG1 PE=1 SV=2	18.8751	5.03		1	13	13	26	IsMasterProtein	113.676	1049	21000000				10000000			3900000		2500000
Q6ZVX7	Lineal	0.225198	0.778992	11.6496	F-box only protein 50 OS=Homo sapiens GN=NCCRP1 PE=1 SV=1	17.8182	6.62		1	3	3	5	IsMasterProtein	30.828	275	2000000				8200000
P05089	Lineal	0.238206	0.778992	10.7057	Arginase-1 OS=Homo sapiens GN=ARG1 PE=1 SV=2	36.3354	7.21		1	7	7	8	IsMasterProtein	34.713	322	2200000				9500000
Q5T749	Lineal	0.241445	0.778992	6.15495	Keratinocyte proline-rich protein OS=Homo sapiens GN=KPRP PE=1 SV=1	27.4611	8.27		1	9	9	10	IsMasterProtein	64.093	579	8300000	3500000			17000000
P21796	Lineal	0.250862	0.778992	9.90545	Voltage-dependent anion-selective channel protein 1 OS=Homo sapiens GN=VDAC1 PE=1 SV=2	19.4346	8.54		1	4	4	6	IsMasterProtein	30.754	283	1600000				5500000
P04275	Censurado	0.269432	0.483596	2.45227	von Willebrand factor OS=Homo sapiens GN=VWF PE=1 SV=4	4.08816	5.48		1	3	10	81	IsMasterProtein	309.058	2813	38000000	75000000	68000000		31000000	44000000	25000000	47000000	310000000	40000000
P55072	Lineal	0.277858	0.808496	8.50004	Transitional endoplasmic reticulum ATPase OS=Homo sapiens GN=VCP PE=1 SV=4	5.45906	5.26		1	3	3	4	IsMasterProtein	89.266	806	480000				1800000
P31151	Lineal	0.31341	0.808496	7.09943	Protein S100-A7 OS=Homo sapiens GN=S100A7 PE=1 SV=4	54.4554	6.77		1	6	6	22	IsMasterProtein	11.464	101	49000000				340000000
P02751	Censurado	0.330638	0.578617	1.8619	Fibronectin OS=Homo sapiens GN=FN1 PE=1 SV=4	43.2523	5.71		1	35	65	458	IsMasterProtein	262.46	2386	11000000	3100000	37000000		3700000	5900000	5000000	43000000	21000000	25000000
Q8WVV4	Lineal	0.337848	0.808496	6.34428	Protein POF1B OS=Homo sapiens GN=POF1B PE=1 SV=3	3.73514	6.32		1	2	2	3	IsMasterProtein	68.022	589	2100000				5300000
Q96CF2	Lineal	0.338067	0.808496	3.35257	Charged multivesicular body protein 4c OS=Homo sapiens GN=CHMP4C PE=1 SV=1	3.43348	6.07		1	1	1	11	IsMasterProtein	26.394	233	220000000	19000000					310000000		1300000000
P12273	Lineal	0.344239	0.808496	-3.27428	Prolactin-inducible protein OS=Homo sapiens GN=PIP PE=1 SV=1	32.1918	8.05		1	4	4	6	IsMasterProtein	16.562	146	5700000				1700000			2800000		3900000
O95445	Censurado	0.346746	0.592005	1.6871	Apolipoprotein M OS=Homo sapiens GN=APOM PE=1 SV=2	46.2766	6.01		1	6	6	59	IsMasterProtein	21.239	188	7600000	7500000	31000000		3600000	12000000	27000000	31000000	19000000	7700000
Q8TF72	Lineal	0.387627	0.808496	8.23885	Protein Shroom3 OS=Homo sapiens GN=SHROOM3 PE=1 SV=2	0.450902	7.8		1	1	1	6	IsMasterProtein	216.724	1996				32000000	420000000			640000000	11000000
Q06830	Lineal	0.392791	0.808496	-5.05578	Peroxiredoxin-1 OS=Homo sapiens GN=PRDX1 PE=1 SV=1	15.5779	8.13		1	2	3	3	IsMasterProtein	22.096	199	12000000				2600000
P04792	Lineal	0.397396	0.808496	4.96722	Heat shock protein beta-1 OS=Homo sapiens GN=HSPB1 PE=1 SV=2	45.3659	6.4		1	6	6	7	IsMasterProtein	22.768	205	10000000				24000000
P62258	Lineal	0.411451	0.809186	-4.69354	14-3-3 protein epsilon OS=Homo sapiens GN=YWHAE PE=1 SV=1	30.9804	4.74		1	4	7	24	IsMasterProtein	29.155	255	4600000				3100000					580000
P0C0S8	Censurado	0.444332	0.740554	1.46726	Histone H2A type 1 OS=Homo sapiens GN=HIST1H2AG PE=1 SV=2	21.5385	10.9		1	2	2	12	IsMasterProtein	14.083	130	32000000	6600000	9600000		13000000	5400000	5700000	17000000	15000000	12000000
P47929	Lineal	0.459129	0.873827	-7.15669	Galectin-7 OS=Homo sapiens GN=LGALS7 PE=1 SV=2	60.2941	7.62		1	6	6	14	IsMasterProtein	15.066	136	33000000				37000000			2000000
P35579	Censurado	0.471007	0.752518	1.27381	Myosin-9 OS=Homo sapiens GN=MYH9 PE=1 SV=4	23.4694	5.6		1	6	36	99	IsMasterProtein	226.392	1960	21000000	4600000	8500000		7200000	3600000	5700000	10000000	30000000	4300000
Q86YZ3	Censurado	0.489426	0.752518	1.6598	Hornerin OS=Homo sapiens GN=HRNR PE=1 SV=2	17.8596	10.04		1	15	15	105	IsMasterProtein	282.228	2850	50000000	20000000	5200000		15000000	1000000	9500000	88000000	8800000	73000000
P14923	Censurado	0.490304	0.752518	2.99276	Junction plakoglobin OS=Homo sapiens GN=JUP PE=1 SV=3	40	6.14		1	21	21	52	IsMasterProtein	81.693	745	17000000			770000	19000000			12000000	6600000	12000000
P61769	Censurado	0.496065	0.752518	2.56449	Beta-2-microglobulin OS=Homo sapiens GN=B2M PE=1 SV=1	31.9328	6.52		1	3	3	24	IsMasterProtein	13.706	119	3100000		5300000		2000000		30000000	13000000	16000000
A6NIZ1	Censurado	0.51459	0.752518	1.22219	Ras-related protein Rap-1b-like protein OS=Homo sapiens PE=2 SV=1	22.8261	5.48		1	4	4	18	IsMasterProtein	20.912	184	18000000	7500000	3300000		3700000	4100000	5700000	6400000	3700000	33000000
P15924	Censurado	0.516012	0.752518	2.93876	Desmoplakin OS=Homo sapiens GN=DSP PE=1 SV=3	24.6952	6.81		1	60	60	112	IsMasterProtein	331.569	2871	23000000	860000			25000000			15000000	5400000	13000000
P01834	Lineal	0.525465	0.965124	3.22401	Ig kappa chain C region OS=Homo sapiens GN=IGKC PE=1 SV=1	32.0755	5.87		1	2	2	3	IsMasterProtein	11.602	106	3900000				6300000
P31944	Lineal	0.571414	0.965124	2.53841	Caspase-14 OS=Homo sapiens GN=CASP14 PE=1 SV=2	23.9669	5.58		1	5	5	9	IsMasterProtein	27.662	242	3000000				9700000			4900000
P07355	Censurado	0.576344	0.823348	2.34701	Annexin A2 OS=Homo sapiens GN=ANXA2 PE=1 SV=2	45.1327	7.75	Acetyl [N-Term]	1	15	15	32	IsMasterProtein	38.58	339	13000000	710000			47000000			3700000	2600000	3900000
Q01469	Lineal	0.594472	0.965124	-3.28397	Fatty acid-binding protein, epidermal OS=Homo sapiens GN=FABP5 PE=1 SV=3	59.2593	7.01	Acetyl [N-Term]	1	7	7	14	IsMasterProtein	15.155	135	11000000				29000000			2600000		1400000
Q9NZT1	Censurado	0.61895	0.86653	2.66949	Calmodulin-like protein 5 OS=Homo sapiens GN=CALML5 PE=1 SV=2	71.2329	4.44	Acetyl [N-Term]	1	10	10	34	IsMasterProtein	15.883	146	100000000	5900000			92000000		6400000	39000000		32000000
O43451	Lineal	0.622894	0.965124	-1.95489	Maltase-glucoamylase, intestinal OS=Homo sapiens GN=MGAM PE=1 SV=5	2.53096	5.5		1	3	3	16	IsMasterProtein	209.72	1857	2400000							2100000		1600000
P06733	Lineal	0.64097	0.965124	2.33104	Alpha-enolase OS=Homo sapiens GN=ENO1 PE=1 SV=2	22.3502	7.39		1	4	7	10	IsMasterProtein	47.139	434	5600000				7900000
P35542	Censurado	0.650915	0.893413	1.41101	Serum amyloid A-4 protein OS=Homo sapiens GN=SAA4 PE=1 SV=2	33.0769	9.07		1	4	4	50	IsMasterProtein	14.737	130	14000000	7500000	60000000		16000000	34000000	77000000	65000000	95000000
P06702	Lineal	0.668725	0.965124	-4.08925	Protein S100-A9 OS=Homo sapiens GN=S100A9 PE=1 SV=1	60.5263	6.13		1	6	6	28	IsMasterProtein	13.234	114	190000000				430000000					1800000
P31947	Lineal	0.682318	0.965124	2.09524	14-3-3 protein sigma OS=Homo sapiens GN=SFN PE=1 SV=1	37.9032	4.74		1	4	8	25	IsMasterProtein	27.757	248	22000000				25000000
P04040	Lineal	0.716765	0.965124	1.9225	Catalase OS=Homo sapiens GN=CAT PE=1 SV=3	7.02087	7.39		1	3	3	5	IsMasterProtein	59.719	527	2600000				2900000
P26038	Lineal	0.718743	0.965124	-1.50897	Moesin OS=Homo sapiens GN=MSN PE=1 SV=3	10.9185	6.4		1	4	6	36	IsMasterProtein	67.778	577	2700000	510000			950000			1100000
P69905	Censurado	0.72005	0.969298	2.54085	Hemoglobin subunit alpha OS=Homo sapiens GN=HBA1 PE=1 SV=2	40.1408	8.68		1	2	4	34	IsMasterProtein	15.248	142	1600000000	520000000			140000000			100000000	950000000	880000000
P27105	Lineal	0.755594	0.965124	1.74923	Erythrocyte band 7 integral membrane protein OS=Homo sapiens GN=STOM PE=1 SV=3	8.33333	7.88		1	2	2	4	IsMasterProtein	31.711	288	1800000									2400000
P05109	Lineal	0.76038	0.965124	-2.98085	Protein S100-A8 OS=Homo sapiens GN=S100A8 PE=1 SV=1	52.6882	7.03		1	7	7	20	IsMasterProtein	10.828	93	250000000				780000000					2000000
P20930	Lineal	0.797832	0.965124	-1.56282	Filaggrin OS=Homo sapiens GN=FLG PE=1 SV=3	2.43782	9.25		1	7	7	13	IsMasterProtein	434.922	4061	3100000				6500000			2900000		640000
P04406	Lineal	0.8001	0.965124	1.85583	Glyceraldehyde-3-phosphate dehydrogenase OS=Homo sapiens GN=GAPDH PE=1 SV=3	45.6716	8.46		1	6	10	24	IsMasterProtein	36.03	335	5800000				47000000					1800000
P02656	Lineal	0.830476	0.965124	1.15916	Apolipoprotein C-III OS=Homo sapiens GN=APOC3 PE=1 SV=1	62.6263	5.41		1	8	8	75	IsMasterProtein	10.845	99	820000000	380000000	830000000	58000000	120000000	150000000	570000000	790000000	810000000	290000000
P62979	Censurado	0.837658	0.993557	-0.809862	Ubiquitin-40S ribosomal protein S27a OS=Homo sapiens GN=RPS27A PE=1 SV=2	25.641	9.64		1	4	4	22	IsMasterProtein	17.953	156	16000000	12000000	15000000		16000000			31000000	39000000	37000000
P68366	Lineal	0.870789	0.965124	1.33706	Tubulin alpha-4A chain OS=Homo sapiens GN=TUBA4A PE=1 SV=1	17.6339	5.06		1	2	6	16	IsMasterProtein	49.892	448	3600000				3100000
Q6Q788	Lineal	0.8724	0.965124	1.25371	Apolipoprotein A-V OS=Homo sapiens GN=APOA5 PE=1 SV=1	5.46448	6.43		1	1	1	6	IsMasterProtein	41.187	366			750000						1000000	1600000
Q00610	Censurado	0.874168	0.993557	-0.566246	Clathrin heavy chain 1 OS=Homo sapiens GN=CLTC PE=1 SV=5	15.2239	5.69		1	17	17	32	IsMasterProtein	191.493	1675	3600000	18000000	1100000		62000000		1400000	1800000		9100000
P48594	Lineal	0.878474	0.965124	-1.31389	Serpin B4 OS=Homo sapiens GN=SERPINB4 PE=1 SV=2	29.4872	6.21		1	3	9	16	IsMasterProtein	44.825	390	13000000				7500000
Q13835	Lineal	0.915982	0.965124	1.2172	Plakophilin-1 OS=Homo sapiens GN=PKP1 PE=1 SV=2	8.5676	9.13		1	4	4	6	IsMasterProtein	82.808	747	2500000				5800000					890000
P62158	Censurado	0.922844	0.993557	0.265144	Calmodulin OS=Homo sapiens GN=CALM1 PE=1 SV=2	26.1745	4.22	Acetyl [N-Term]	1	3	4	19	IsMasterProtein	16.827	149	14000000	4200000	6800000		23000000	1500000		6600000	7300000	11000000
Q5D862	Censurado	0.923013	0.993557	0.493449	Filaggrin-2 OS=Homo sapiens GN=FLG2 PE=1 SV=1	6.69176	8.31		1	8	8	20	IsMasterProtein	247.928	2391	15000000	1400000			5600000			16000000		8200000
O14791	Lineal	0.927734	0.965124	1.10691	Apolipoprotein L1 OS=Homo sapiens GN=APOL1 PE=1 SV=5	18.8442	5.81		1	5	5	30	IsMasterProtein	43.947	398	4100000		1300000				7600000	3500000
O60814	Lineal	0.935091	0.965124	-1.17114	Histone H2B type 1-K OS=Homo sapiens GN=HIST1H2BK PE=1 SV=3	31.746	10.32		1	4	4	7	IsMasterProtein	13.882	126	14000000	820000			2800000
P83881	Lineal	0.944203	0.965124	-1.13288	60S ribosomal protein L36a OS=Homo sapiens GN=RPL36A PE=1 SV=2	15.0943	10.58		1	2	2	3	IsMasterProtein	12.433	106	3800000						5900000
P35030	Lineal	0.948766	0.965124	-1.04136	Trypsin-3 OS=Homo sapiens GN=PRSS3 PE=1 SV=2	4.27632	7.49		1	1	1	18	IsMasterProtein	32.508	304	53000000	71000000	140000000	13000000	26000000	84000000	97000000	85000000	67000000	32000000
P01040	Censurado	0.971813	0.993557	0.182965	Cystatin-A OS=Homo sapiens GN=CSTA PE=1 SV=1	38.7755	5.5		1	3	3	9	IsMasterProtein	11	98	14000000	1600000			25000000		1900000	8900000
P10599	Censurado	0.973589	0.993557	0.190321	Thioredoxin OS=Homo sapiens GN=TXN PE=1 SV=3	20.9524	4.92		1	2	2	6	IsMasterProtein	11.73	105	23000000		4300000		39000000			17000000	6400000
Q14624	Censurado	0.9778	0.993557	27.7375	Inter-alpha-trypsin inhibitor heavy chain H4 OS=Homo sapiens GN=ITIH4 PE=1 SV=4	40.5376	6.98		1	23	26	140	IsMasterProtein	103.293	930					4800000	14000000	58000000	48000000	43000000
P03952	Censurado	0.979068	0.993557	27.4593	Plasma kallikrein OS=Homo sapiens GN=KLKB1 PE=1 SV=1	56.8966	8.22		1	24	25	179	IsMasterProtein	71.323	638					3000000	10000000	44000000	62000000	56000000
P08519	Censurado	0.979227	0.993557	29.9218	Apolipoprotein(a) OS=Homo sapiens GN=LPA PE=1 SV=1	29.5075	5.88		1	6	6	16	IsMasterProtein	500.995	4548					33000000	20000000		5400000	140000000	4200000
Q08554	Censurado	0.980307	0.993557	-0.131283	Desmocollin-1 OS=Homo sapiens GN=DSC1 PE=1 SV=2	4.69799	5.43		1	3	3	10	IsMasterProtein	99.924	894	28000000	2000000						18000000	8700000	12000000
P00739	Censurado	0.981037	0.993557	22.2302	Haptoglobin-related protein OS=Homo sapiens GN=HPR PE=2 SV=2	50.5747	7.09		1	6	18	152	IsMasterProtein	39.005	348						1900000	5000000	7400000	7900000	15000000
P0C0L4	Censurado	0.984206	0.993557	10.6749	Complement C4-A OS=Homo sapiens GN=C4A PE=1 SV=2	55.2752	7.08		1	2	68	637	IsMasterProtein	192.664	1744					4900000	8600000	17000000	26000000	19000000	5100000
P01031	Censurado	0.985248	0.993557	21.4352	Complement C5 OS=Homo sapiens GN=C5 PE=1 SV=4	42.0048	6.52		1	49	52	291	IsMasterProtein	188.186	1676						1100000	11000000	7300000	21000000	1600000
Q13790	Censurado	0.985872	0.993557	16.4031	Apolipoprotein F OS=Homo sapiens GN=APOF PE=1 SV=2	22.0859	5.64		1	4	4	19	IsMasterProtein	35.377	326					11000000	15000000	2800000	12000000	7500000	15000000
P05160	Censurado	0.985905	0.993557	20.6858	Coagulation factor XIII B chain OS=Homo sapiens GN=F13B PE=1 SV=3	39.1831	6.39		1	15	17	84	IsMasterProtein	75.461	661						2100000	12000000	6900000	11000000	3100000
P01019	Censurado	0.986331	0.993557	20.5721	Angiotensinogen OS=Homo sapiens GN=AGT PE=1 SV=1	32.3711	6.32		1	9	9	58	IsMasterProtein	53.121	485					780000	2000000	20000000	4900000	11000000
P12532	Lineal	0.990105	0.990105	1.02235	Creatine kinase U-type, mitochondrial OS=Homo sapiens GN=CKMT1A PE=1 SV=1	17.506	8.34		1	5	5	15	IsMasterProtein	47.007	417			27000000		15000000
P00736	Censurado	0.993557	0.993557	0.0293218	Complement C1r subcomponent OS=Homo sapiens GN=C1R PE=1 SV=2	26.5248	6.21		1	9	13	103	IsMasterProtein	80.067	705	1300000		4100000				2000000	7800000	3200000
Q86XR2	Lineal	NA	NA	NA	Niban-like protein 2 OS=Homo sapiens GN=FAM129C PE=1 SV=2	1.14778	8.63		1	1	1	11	IsMasterProtein	77.364	697						22000000	5000000	11000000		9000000
P49720	Lineal	NA	NA	NA	Proteasome subunit beta type-3 OS=Homo sapiens GN=PSMB3 PE=1 SV=2	28.7805	6.55		1	4	4	23	IsMasterProtein	22.933	205					1200000		3600000	4600000	5800000
P00748	Lineal	NA	NA	NA	Coagulation factor XII OS=Homo sapiens GN=F12 PE=1 SV=3	23.0894	7.74		1	10	10	52	IsMasterProtein	67.748	615						4700000	16000000	17000000	9400000
P02790	Lineal	NA	NA	NA	Hemopexin OS=Homo sapiens GN=HPX PE=1 SV=2	49.3506	7.02		1	13	14	93	IsMasterProtein	51.643	462						7000000	260000000	32000000		2400000
P00167	Lineal	NA	NA	NA	Cytochrome b5 OS=Homo sapiens GN=CYB5A PE=1 SV=2	15.6716	4.96		1	1	1	8	IsMasterProtein	15.321	134					1700000	730000				8700000
P11047	Lineal	NA	NA	NA	Laminin subunit gamma-1 OS=Homo sapiens GN=LAMC1 PE=1 SV=3	7.5202	5.12		1	1	10	34	IsMasterProtein	177.489	1609						3400000		7800000		6100000
O00187	Lineal	NA	NA	NA	Mannan-binding lectin serine protease 2 OS=Homo sapiens GN=MASP2 PE=1 SV=4	7.58017	5.63		1	2	4	31	IsMasterProtein	75.654	686						1500000	2000000		2900000
P00742	Lineal	NA	NA	NA	Coagulation factor X OS=Homo sapiens GN=F10 PE=1 SV=2	10.041	5.94		1	3	4	17	IsMasterProtein	54.697	488						270000		3600000	590000
P25787	Lineal	NA	NA	NA	Proteasome subunit alpha type-2 OS=Homo sapiens GN=PSMA2 PE=1 SV=2	32.4786	7.43		1	4	4	28	IsMasterProtein	25.882	234							11000000	9000000	14000000
P48740	Lineal	NA	NA	NA	Mannan-binding lectin serine protease 1 OS=Homo sapiens GN=MASP1 PE=1 SV=3	25.1788	5.49		1	8	14	101	IsMasterProtein	79.195	699							5200000	5900000		12000000
P49908	Lineal	NA	NA	NA	Selenoprotein P OS=Homo sapiens GN=SEPP1 PE=1 SV=3	13.9108	7.87		1	3	4	9	IsMasterProtein	43.156	381									13000000	4100000
O75882	Lineal	NA	NA	NA	Attractin OS=Homo sapiens GN=ATRN PE=1 SV=2	7.83765	7.31		1	8	8	41	IsMasterProtein	158.432	1429							3500000	3100000
P80108	Lineal	NA	NA	NA	Phosphatidylinositol-glycan-specific phospholipase D OS=Homo sapiens GN=GPLD1 PE=1 SV=3	17.1429	6.37		1	8	9	37	IsMasterProtein	92.278	840							4300000		1800000
P06276	Lineal	NA	NA	NA	Cholinesterase OS=Homo sapiens GN=BCHE PE=1 SV=1	28.4053	7.42		1	9	10	46	IsMasterProtein	68.374	602							6600000		3400000
Q96PD5	Lineal	NA	NA	NA	N-acetylmuramoyl-L-alanine amidase OS=Homo sapiens GN=PGLYRP2 PE=1 SV=1	34.0278	7.55		1	11	11	51	IsMasterProtein	62.178	576							28000000	8800000
P13671	Lineal	NA	NA	NA	Complement component C6 OS=Homo sapiens GN=C6 PE=1 SV=3	18.6296	6.76		1	12	12	53	IsMasterProtein	104.718	934							5200000			710000
P31645	Lineal	NA	NA	NA	Sodium-dependent serotonin transporter OS=Homo sapiens GN=SLC6A4 PE=1 SV=1	2.53968	6.25		1	1	1	2	IsMasterProtein	70.279	630	3500000		1500000
P05090	Lineal	NA	NA	NA	Apolipoprotein D OS=Homo sapiens GN=APOD PE=1 SV=1	13.2275	5.15		1	2	2	3	IsMasterProtein	21.262	189					8200000
P06744	Lineal	NA	NA	NA	Glucose-6-phosphate isomerase OS=Homo sapiens GN=GPI PE=1 SV=4	3.94265	8.32		1	2	2	2	IsMasterProtein	63.107	558					1300000
P07686	Lineal	NA	NA	NA	Beta-hexosaminidase subunit beta OS=Homo sapiens GN=HEXB PE=1 SV=3	4.13669	6.76		1	2	2	2	IsMasterProtein	63.071	556					1600000
P07919	Lineal	NA	NA	NA	Cytochrome b-c1 complex subunit 6, mitochondrial OS=Homo sapiens GN=UQCRH PE=1 SV=2	27.4725	4.44		1	2	2	2	IsMasterProtein	10.732	91					4800000
P09211	Lineal	NA	NA	NA	Glutathione S-transferase P OS=Homo sapiens GN=GSTP1 PE=1 SV=2	10	5.64		1	2	2	2	IsMasterProtein	23.341	210					12000000
P10809	Lineal	NA	NA	NA	60 kDa heat shock protein, mitochondrial OS=Homo sapiens GN=HSPD1 PE=1 SV=2	6.45724	5.87		1	2	2	2	IsMasterProtein	61.016	573					1500000
P15104	Lineal	NA	NA	NA	Glutamine synthetase OS=Homo sapiens GN=GLUL PE=1 SV=4	7.23861	6.89	Acetyl [N-Term]	1	2	2	2	IsMasterProtein	42.037	373					10000000
P15309	Lineal	NA	NA	NA	Prostatic acid phosphatase OS=Homo sapiens GN=ACPP PE=1 SV=3	7.77202	6.24		1	2	2	2	IsMasterProtein	44.537	386					3900000
P22528	Lineal	NA	NA	NA	Cornifin-B OS=Homo sapiens GN=SPRR1B PE=1 SV=2	34.8315	8.48		1	2	2	2	IsMasterProtein	9.881	89					6200000
P22695	Lineal	NA	NA	NA	Cytochrome b-c1 complex subunit 2, mitochondrial OS=Homo sapiens GN=UQCRC2 PE=1 SV=3	6.40177	8.63		1	2	2	2	IsMasterProtein	48.413	453					1700000
P35232	Lineal	NA	NA	NA	Prohibitin OS=Homo sapiens GN=PHB PE=1 SV=1	8.82353	5.76		1	2	2	2	IsMasterProtein	29.786	272					2800000
P35268	Lineal	NA	NA	NA	60S ribosomal protein L22 OS=Homo sapiens GN=RPL22 PE=1 SV=2	18.75	9.19		1	2	2	2	IsMasterProtein	14.778	128					2100000
P36955	Lineal	NA	NA	NA	Pigment epithelium-derived factor OS=Homo sapiens GN=SERPINF1 PE=1 SV=4	7.41627	6.38		1	2	2	2	IsMasterProtein	46.283	418							3100000
P36980	Lineal	NA	NA	NA	Complement factor H-related protein 2 OS=Homo sapiens GN=CFHR2 PE=1 SV=1	12.5926	6.38		1	2	3	14	IsMasterProtein	30.631	270							1500000
P38646	Lineal	NA	NA	NA	Stress-70 protein, mitochondrial OS=Homo sapiens GN=HSPA9 PE=1 SV=2	3.09278	6.16		1	2	2	2	IsMasterProtein	73.635	679					1300000
P49419	Lineal	NA	NA	NA	Alpha-aminoadipic semialdehyde dehydrogenase OS=Homo sapiens GN=ALDH7A1 PE=1 SV=5	6.30798	7.99		1	2	2	2	IsMasterProtein	58.45	539					360000
P49755	Lineal	NA	NA	NA	Transmembrane emp24 domain-containing protein 10 OS=Homo sapiens GN=TMED10 PE=1 SV=2	9.58904	7.44		1	2	2	3	IsMasterProtein	24.96	219					1100000
P53634	Lineal	NA	NA	NA	Dipeptidyl peptidase 1 OS=Homo sapiens GN=CTSC PE=1 SV=2	9.28726	6.99		1	2	2	3	IsMasterProtein	51.82	463					4700000
P55084	Lineal	NA	NA	NA	Trifunctional enzyme subunit beta, mitochondrial OS=Homo sapiens GN=HADHB PE=1 SV=3	4.85232	9.41		1	2	2	2	IsMasterProtein	51.262	474					2800000
Q6NUJ1	Lineal	NA	NA	NA	Proactivator polypeptide-like 1 OS=Homo sapiens GN=PSAPL1 PE=2 SV=2	5.75816	7.27		1	2	2	3	IsMasterProtein	56.589	521					16000000
Q7L5L3	Lineal	NA	NA	NA	Glycerophosphodiester phosphodiesterase domain-containing protein 3 OS=Homo sapiens GN=GDPD3 PE=2 SV=3	8.1761	7.97		1	2	2	2	IsMasterProtein	36.573	318					5600000
Q96FQ6	Lineal	NA	NA	NA	Protein S100-A16 OS=Homo sapiens GN=S100A16 PE=1 SV=1	29.1262	6.79		1	2	2	2	IsMasterProtein	11.794	103					4400000
Q99798	Lineal	NA	NA	NA	Aconitate hydratase, mitochondrial OS=Homo sapiens GN=ACO2 PE=1 SV=2	3.97436	7.61		1	2	2	2	IsMasterProtein	85.372	780					3100000
O60911	Lineal	NA	NA	NA	Cathepsin L2 OS=Homo sapiens GN=CTSV PE=1 SV=2	14.0719	8.76		1	3	3	3	IsMasterProtein	37.305	334					11000000
P00441	Lineal	NA	NA	NA	Superoxide dismutase [Cu-Zn] OS=Homo sapiens GN=SOD1 PE=1 SV=2	32.4675	6.13		1	3	3	3	IsMasterProtein	15.926	154					7700000
P00558	Lineal	NA	NA	NA	Phosphoglycerate kinase 1 OS=Homo sapiens GN=PGK1 PE=1 SV=3	11.0312	8.1		1	3	3	3	IsMasterProtein	44.586	417					3700000
P04080	Lineal	NA	NA	NA	Cystatin-B OS=Homo sapiens GN=CSTB PE=1 SV=2	48.9796	7.56	Acetyl [N-Term]	1	3	3	3	IsMasterProtein	11.133	98					17000000
P04083	Lineal	NA	NA	NA	Annexin A1 OS=Homo sapiens GN=ANXA1 PE=1 SV=2	12.4277	7.02		1	3	3	4	IsMasterProtein	38.69	346					2000000
P06396	Lineal	NA	NA	NA	Gelsolin OS=Homo sapiens GN=GSN PE=1 SV=1	22.1228	6.28		1	3	12	81	IsMasterProtein	85.644	782					2100000
P09525	Lineal	NA	NA	NA	Annexin A4 OS=Homo sapiens GN=ANXA4 PE=1 SV=4	13.4796	6.13		1	3	3	3	IsMasterProtein	35.86	319					4100000
P10619	Lineal	NA	NA	NA	Lysosomal protective protein OS=Homo sapiens GN=CTSA PE=1 SV=2	9.79167	6.61		1	3	3	4	IsMasterProtein	54.431	480					5400000
P12429	Lineal	NA	NA	NA	Annexin A3 OS=Homo sapiens GN=ANXA3 PE=1 SV=3	10.8359	5.92	Acetyl [N-Term]	1	3	3	3	IsMasterProtein	36.353	323					1300000
P13639	Lineal	NA	NA	NA	Elongation factor 2 OS=Homo sapiens GN=EEF2 PE=1 SV=4	5.82751	6.83		1	3	3	3	IsMasterProtein	95.277	858					9100000
P13928	Lineal	NA	NA	NA	Annexin A8 OS=Homo sapiens GN=ANXA8 PE=1 SV=3	11.315	5.78		1	3	3	3	IsMasterProtein	36.858	327					3300000
P40939	Lineal	NA	NA	NA	Trifunctional enzyme subunit alpha, mitochondrial OS=Homo sapiens GN=HADHA PE=1 SV=2	7.20839	9.04		1	3	3	3	IsMasterProtein	82.947	763					1400000
P67936	Lineal	NA	NA	NA	Tropomyosin alpha-4 chain OS=Homo sapiens GN=TPM4 PE=1 SV=3	16.9355	4.69		1	3	4	4	IsMasterProtein	28.504	248					4700000
Q6GTS8	Lineal	NA	NA	NA	N-fatty-acyl-amino acid synthase/hydrolase PM20D1 OS=Homo sapiens GN=PM20D1 PE=1 SV=3	7.37052	6.67		1	3	3	3	IsMasterProtein	55.706	502					4500000
Q9UGM5	Lineal	NA	NA	NA	Fetuin-B OS=Homo sapiens GN=FETUB PE=1 SV=2	7.06806	6.83		1	3	3	5	IsMasterProtein	42.028	382							1300000
P04278	Lineal	NA	NA	NA	Sex hormone-binding globulin OS=Homo sapiens GN=SHBG PE=1 SV=2	17.1642	6.71		1	4	4	12	IsMasterProtein	43.752	402							3800000
P05543	Lineal	NA	NA	NA	Thyroxine-binding globulin OS=Homo sapiens GN=SERPINA7 PE=1 SV=2	9.15663	6.3		1	4	4	7	IsMasterProtein	46.295	415							2900000
P07357	Lineal	NA	NA	NA	Complement component C8 alpha chain OS=Homo sapiens GN=C8A PE=1 SV=2	9.58904	6.47		1	4	4	15	IsMasterProtein	65.121	584							2500000
P07858	Lineal	NA	NA	NA	Cathepsin B OS=Homo sapiens GN=CTSB PE=1 SV=3	15.0442	6.3		1	4	4	4	IsMasterProtein	37.797	339					16000000
P27482	Lineal	NA	NA	NA	Calmodulin-like protein 3 OS=Homo sapiens GN=CALML3 PE=1 SV=2	36.9128	4.42		1	4	5	5	IsMasterProtein	16.88	149					37000000
P31949	Lineal	NA	NA	NA	Protein S100-A11 OS=Homo sapiens GN=S100A11 PE=1 SV=2	62.8571	7.12		1	4	4	4	IsMasterProtein	11.733	105					13000000
P49748	Lineal	NA	NA	NA	Very long-chain specific acyl-CoA dehydrogenase, mitochondrial OS=Homo sapiens GN=ACADVL PE=1 SV=1	8.85496	8.75		1	4	4	4	IsMasterProtein	70.345	655					3500000
Q15149	Lineal	NA	NA	NA	Plectin OS=Homo sapiens GN=PLEC PE=1 SV=3	0.960717	5.96		1	4	4	4	IsMasterProtein	531.466	4684					1300000
Q9Y6N5	Lineal	NA	NA	NA	Sulfide:quinone oxidoreductase, mitochondrial OS=Homo sapiens GN=SQRDL PE=1 SV=1	11.1111	9.11		1	4	4	4	IsMasterProtein	49.929	450					2000000
P00367	Lineal	NA	NA	NA	Glutamate dehydrogenase 1, mitochondrial OS=Homo sapiens GN=GLUD1 PE=1 SV=2	10.3943	7.8		1	5	5	13	IsMasterProtein	61.359	558							1300000
P05546	Lineal	NA	NA	NA	Heparin cofactor 2 OS=Homo sapiens GN=SERPIND1 PE=1 SV=3	20.4409	6.9		1	5	9	40	IsMasterProtein	57.034	499							7300000
P07476	Lineal	NA	NA	NA	Involucrin OS=Homo sapiens GN=IVL PE=1 SV=2	12.3077	4.61		1	5	5	5	IsMasterProtein	68.437	585					18000000
P29508	Lineal	NA	NA	NA	Serpin B3 OS=Homo sapiens GN=SERPINB3 PE=1 SV=2	39.4872	6.81		1	6	12	17	IsMasterProtein	44.537	390					20000000
P29622	Lineal	NA	NA	NA	Kallistatin OS=Homo sapiens GN=SERPINA4 PE=1 SV=3	20.3747	7.75		1	6	6	16	IsMasterProtein	48.511	427							6900000
P40926	Lineal	NA	NA	NA	Malate dehydrogenase, mitochondrial OS=Homo sapiens GN=MDH2 PE=1 SV=3	27.2189	8.68		1	6	6	6	IsMasterProtein	35.481	338					6500000
P45880	Lineal	NA	NA	NA	Voltage-dependent anion-selective channel protein 2 OS=Homo sapiens GN=VDAC2 PE=1 SV=2	32.6531	7.56		1	7	7	7	IsMasterProtein	31.547	294					9500000
Q7Z406	Lineal	NA	NA	NA	Myosin-14 OS=Homo sapiens GN=MYH14 PE=1 SV=2	7.26817	5.6		1	7	11	15	IsMasterProtein	227.732	1995					2300000
P02753	Lineal	NA	NA	NA	Retinol-binding protein 4 OS=Homo sapiens GN=RBP4 PE=1 SV=3	61.194	6.07		1	8	8	26	IsMasterProtein	22.995	201							81000000
P05156	Lineal	NA	NA	NA	Complement factor I OS=Homo sapiens GN=CFI PE=1 SV=2	19.8971	7.5		1	8	9	32	IsMasterProtein	65.707	583							12000000
P22735	Lineal	NA	NA	NA	Protein-glutamine gamma-glutamyltransferase K OS=Homo sapiens GN=TGM1 PE=1 SV=4	12.1175	6.04		1	8	8	8	IsMasterProtein	89.73	817					6600000
P68871	Lineal	NA	NA	NA	Hemoglobin subunit beta OS=Homo sapiens GN=HBB PE=1 SV=2	67.3469	7.28		1	8	10	32	IsMasterProtein	15.988	147								140000000
P04217	Lineal	NA	NA	NA	Alpha-1B-glycoprotein OS=Homo sapiens GN=A1BG PE=1 SV=4	27.6768	5.86		1	9	10	30	IsMasterProtein	54.22	495							21000000
P06576	Lineal	NA	NA	NA	ATP synthase subunit beta, mitochondrial OS=Homo sapiens GN=ATP5B PE=1 SV=3	25.7089	5.4		1	9	9	12	IsMasterProtein	56.525	529					15000000
P08185	Lineal	NA	NA	NA	Corticosteroid-binding globulin OS=Homo sapiens GN=SERPINA6 PE=1 SV=1	33.8272	6.04		1	9	9	28	IsMasterProtein	45.112	405							22000000
P25705	Lineal	NA	NA	NA	ATP synthase subunit alpha, mitochondrial OS=Homo sapiens GN=ATP5A1 PE=1 SV=1	21.519	9.13		1	9	9	10	IsMasterProtein	59.714	553					11000000
Q06033	Lineal	NA	NA	NA	Inter-alpha-trypsin inhibitor heavy chain H3 OS=Homo sapiens GN=ITIH3 PE=1 SV=2	31.573	5.74		1	9	19	120	IsMasterProtein	99.787	890							29000000
P00734	Lineal	NA	NA	NA	Prothrombin OS=Homo sapiens GN=F2 PE=1 SV=2	39.7106	5.9		1	11	16	86	IsMasterProtein	69.992	622							21000000
P07339	Lineal	NA	NA	NA	Cathepsin D OS=Homo sapiens GN=CTSD PE=1 SV=1	42.9612	6.54		1	11	11	22	IsMasterProtein	44.524	412					78000000
P00751	Lineal	NA	NA	NA	Complement factor B OS=Homo sapiens GN=CFB PE=1 SV=2	27.4869	7.06		1	12	15	93	IsMasterProtein	85.479	764							45000000
P01011	Lineal	NA	NA	NA	Alpha-1-antichymotrypsin OS=Homo sapiens GN=SERPINA3 PE=1 SV=2	43.9716	5.52		1	14	14	83	IsMasterProtein	47.621	423							77000000
A8K2U0	Lineal	NA	NA	NA	Alpha-2-macroglobulin-like protein 1 OS=Homo sapiens GN=A2ML1 PE=1 SV=3	16.9876	5.73		1	17	17	18	IsMasterProtein	161.004	1454					18000000
P43652	Lineal	NA	NA	NA	Afamin OS=Homo sapiens GN=AFM PE=1 SV=1	39.5659	5.9		1	17	20	112	IsMasterProtein	69.024	599							37000000
P09429	Lineal	NA	NA	NA	High mobility group protein B1 OS=Homo sapiens GN=HMGB1 PE=1 SV=3	10.2326	5.74		1	2	2	2	IsMasterProtein	24.878	215	10000000
P19971	Lineal	NA	NA	NA	Thymidine phosphorylase OS=Homo sapiens GN=TYMP PE=1 SV=2	7.05394	5.53		1	2	2	2	IsMasterProtein	49.924	482	650000
P62820	Lineal	NA	NA	NA	Ras-related protein Rab-1A OS=Homo sapiens GN=RAB1A PE=1 SV=3	17.561	6.21		1	2	3	3	IsMasterProtein	22.663	205	1500000
P05023	Lineal	NA	NA	NA	Sodium/potassium-transporting ATPase subunit alpha-1 OS=Homo sapiens GN=ATP1A1 PE=1 SV=1	3.0303	5.49		1	3	3	3	IsMasterProtein	112.824	1023	1700000
Q6UWP8	Lineal	NA	NA	NA	Suprabasin OS=Homo sapiens GN=SBSN PE=1 SV=2	7.79661	7.01		1	3	3	3	IsMasterProtein	60.505	590	4000000
